# Supplementary material for: Direct C–H trifluoromethylation of di- and trisubstituted alkenes by photoredox catalysis
Source: PubMed Central journal article supplement (PMC4077392; doi:10.3762/bjoc.10.108), 2014-05-12

# Supporting Information

for

## Direct C–H trifluoromethylation of di- and trisubstituted alkenes by photoredox catalysis

Ren Tomita, Yusuke Yasu, Takashi Koike\* and Munetaka Akita\*

Address: Chemical Resources Laboratory, Tokyo Institute of Technology, R1-27, 4259

Nagatsuta, Midori-ku, Yokohama 226-8503, Japan

Email: Takashi Koike - koike.t.ad@m.titech.ac.jp; Munetaka Akita - makita@res.titech.ac.jp

\*Corresponding author

### Experimental procedures and NMR spectra

#### Contents

|                                                                                          |     |
|------------------------------------------------------------------------------------------|-----|
| •Materials and methods                                                                   | S2  |
| •Reaction apparatus                                                                      | S2  |
| •Synthesis of alkene <b>2</b>                                                            | S3  |
| •Typical NMR experimental procedures and NMR spectra                                     | S4  |
| •General procedure for the photocatalytic C–H trifluoromethylation of alkenes (Table 2)  | S5  |
| •Procedures for the photocatalytic double C–H trifluoromethylation of alkenes (Scheme 4) | S10 |
| •Time profile of the photocatalytic C–H trifluoromethylation of <b>2a</b> (Figure 1)     | S12 |
| •Assignment of stereochemistry of product <b>3</b>                                       | S13 |
| •References                                                                              | S17 |
| • <sup>1</sup> H, <sup>13</sup> C NMR spectra                                            | S18 |

## Materials and methods

[Ru(bpy)<sub>3</sub>](PF<sub>6</sub>)<sub>2</sub>[1] and *fac*-Ir(ppy)<sub>3</sub>[2] were prepared according to the literature procedures. Umemoto's reagent (**1a**) was purchased from Aldrich. Alkenes **2b**, **2c**, **2d**, **2e**, **2f**, **2g**, **2h**, **2j**, and **2k** were prepared by Wittig reactions. (*E*)-1,2-diphenyl-1-(4-methoxyphenyl)ethylene (**2m**) prepared according to the literature procedure[3]. Catalytic reactions were performed under an atmosphere of nitrogen using standard Schlenk techniques unless otherwise noted. All solvents were dried over molecular sieves, degassed and stored under N<sub>2</sub>. Thin-layer chromatography was performed on Merck TLC plate with 60 F<sub>254</sub>. Visible light irradiations were performed with a Relyon LED lamp (3 W x 2; λ<sub>max</sub> = 425 ± 15 nm). Japan Analytical Industry LC-9201 was utilized for recycling preparative HPLC (GPC). The <sup>1</sup>H NMR was acquired on Bruker AVANCE-400 (400 MHz). NMR chemical shifts were referenced to residual protio impurities in the deuterated solvent. HRMS (ESI-TOF mass spectra) were obtained with a Bruker micrOTOF II.

## Reaction apparatus

Irradiation of visible light was performed with a Relyon LED lamp (3 W x 2; λ<sub>max</sub> = 425 nm).

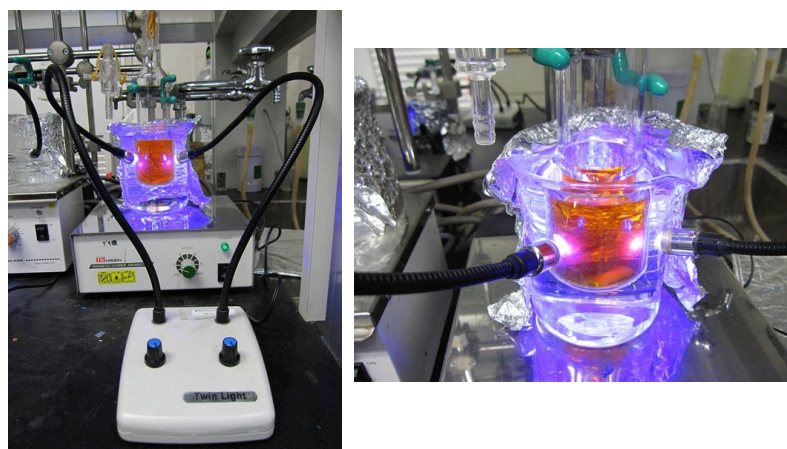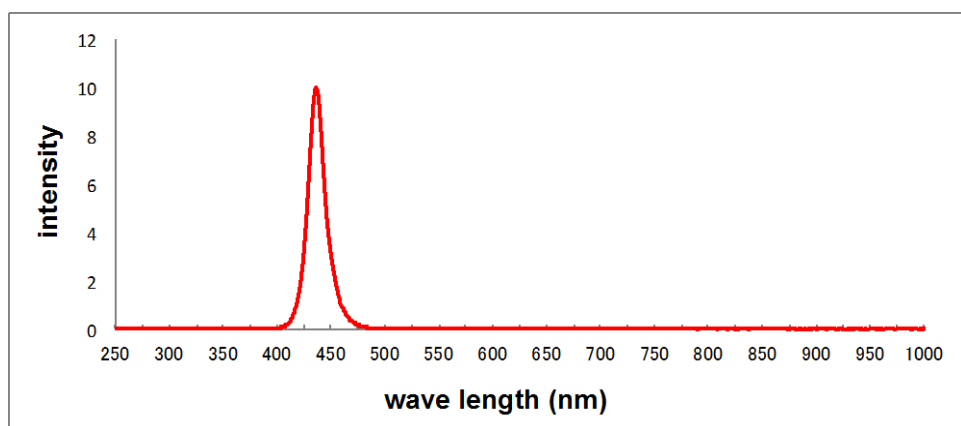

**Figure S1:** The emission spectrum of a Relyon LED lamp.

## Synthesis of alkene 2

General procedure for the synthesis of alkenes (2b, 2c, 2d, 2e, 2g, 2h, 2j and 2k) by Wittig reaction

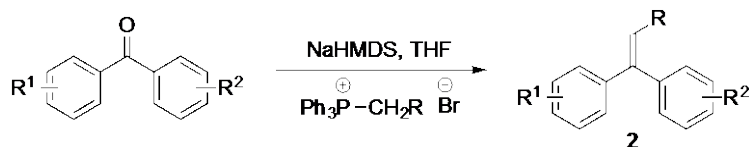

Under N<sub>2</sub>, a 2-neck 100 mL round-bottom flask was charged with Wittig reagent (6 mmol) and dry THF (25 mL). Then sodium hexamethyldisilazide (1 M THF solution, 6 mL) was added into the solution and stirred at room temperature for 1 h. To the solution, benzophenone derivative (5 mmol) was added and stirred at room temperature overnight. Et<sub>2</sub>O was added into the reaction mixture and filtered. The filtrate was concentrated in vacuo and the residue was purified by flash column chromatography on silica gel to afford the product.

### The synthesis of *N*-(*tert*-butoxycarbonyl)-4-(1-phenylvinyl)aniline (2f)

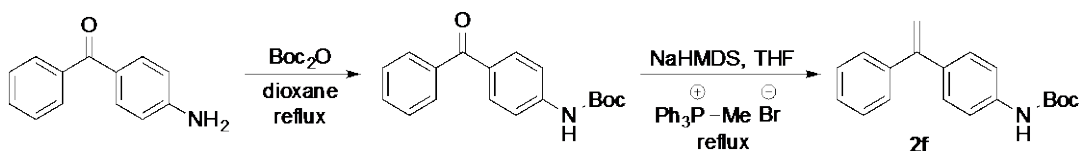

***N*-(*tert*-Butoxycarbonyl)-4-benzoylaniline:** A 2-neck 100 mL round-bottom flask was charged with 4-aminobenzophenone (1.97 g, 10 mmol), di-*tert*-butyl dicarbonate (2.84 g, 13 mmol), and 1,4-dioxane (30 mL). The solution was refluxed overnight and cooled to room temperature. The reaction mixture was concentrated in vacuo and the residue was purified by flash column chromatography on silica gel (hexane/EtOAc = 4:1) to afford *N*-(*tert*-butoxycarbonyl)-4-benzoylaniline (1.35 g, 46% yield).

***N*-(*tert*-Butoxycarbonyl)-4-(1-phenylvinyl)aniline (2f):** Under N<sub>2</sub>, a 2-neck 100 mL round-bottom flask was charged with methyltriphenylphosphonium bromide (1.07 g, 3 mmol) and dry THF (15 mL). Then sodium hexamethyldisilazide (1 M THF solution, 3 mL) was added into the solution and stirred at room temperature for 1 h. To the yellow solution, *N*-(*tert*-butoxycarbonyl)-4-benzoylaniline (0.53 g, 1.8 mmol) was added and refluxed overnight. After cooling to room temperature, Et<sub>2</sub>O was added into the reaction mixture and filtered. The filtrate was concentrated in vacuo and the residue was purified by flash column chromatography on silica gel (hexane/EtOAc = 4:1) to afford *N*-(*tert*-butoxycarbonyl)-4-(1-phenylvinyl)aniline (0.23 g, 44% yield).

<sup>1</sup>H NMR (400 MHz, CDCl<sub>3</sub>, rt): δ 7.34-7.26 (m, 9 H, Ar), 6.48 (brs, 1 H, NH), 5.41 (d, *J* = 1.2 Hz, C=CHH), 5.38 (d, *J* = 1.2 Hz, C=CHH), 1.53 (s, 9 H, C(CH<sub>3</sub>)<sub>3</sub>). <sup>13</sup>C NMR (100 MHz, CDCl<sub>3</sub>, rt): δ 152.8, 149.6, 141.7, 138.1, 136.4, 129.0, 128.4, 128.3, 127.8, 118.3, 113.6, 80.7,

28.5. HRMS (ESI-TOF): calculated for  $[C_{19}H_{21}NO_2+Na]^+$  requires 318.1465, found 318.1464.

### Typical NMR experimental procedures and NMR spectra

#### NMR experimental procedure (entry 1 in Table 1)

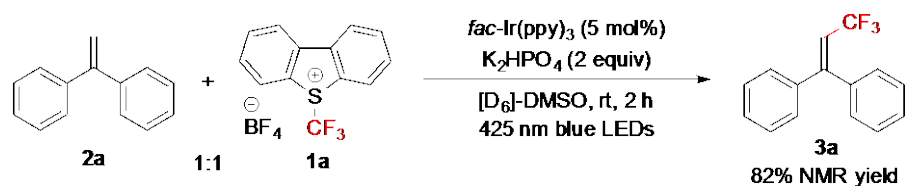

Under N<sub>2</sub>, *fac*-Ir(ppy)<sub>3</sub> (0.8 mg, 1.3 μmol), Umemoto's reagent (**1a**, 8.5 mg, 25 μmol), K<sub>2</sub>HPO<sub>4</sub> (8.7 mg, 50 μmol), 1,1-diphenylethylene (**2a**, 4.3 μL, 25 μmol), SiEt<sub>4</sub> (~1 μL) as an internal standard, and [D<sub>6</sub>]-DMSO (0.5 mL) were added to an NMR tube. The reaction was carried out at room temperature (water bath) under irradiation of visible light (placed at a distance of ~3 cm from a blue LED lamp:  $h\nu = 425 \pm 15$  nm).

#### NMR experimental procedure (entry 8 in Table 1) and NMR spectra

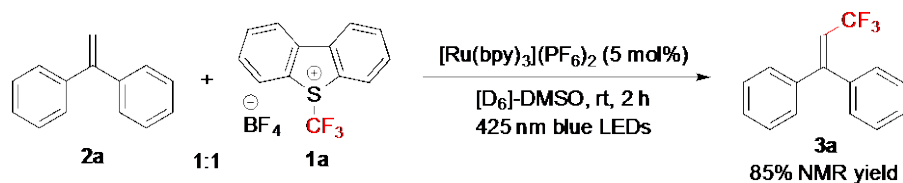

Under N<sub>2</sub>, [Ru(bpy)<sub>3</sub>](PF<sub>6</sub>)<sub>2</sub> (1.1 mg, 1.3 μmol), Umemoto's reagent (**1a**) (8.5 mg, 25 μmol), 1,1-diphenylethylene (**2a**) (4.3 μL, 25 μmol), SiEt<sub>4</sub> (~1 μL) as an internal standard, and [D<sub>6</sub>]-DMSO (0.5 mL) were added to an NMR tube. The reaction was carried out at room temperature (water bath) under irradiation of visible light (placed at a distance of ~3 cm from blue LED lamp:  $h\nu = 425 \pm 15$  nm).

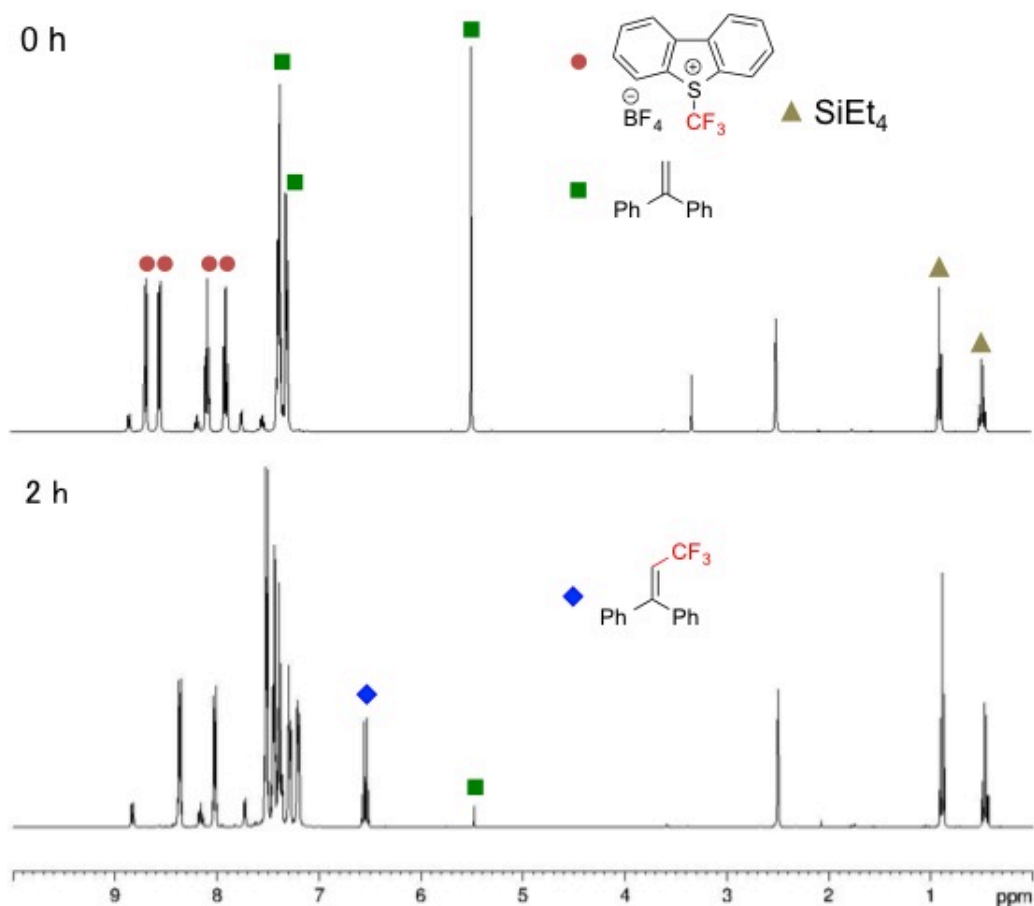

Figure S2.  $^1\text{H}$  NMR spectra (400 MHz,  $[\text{D}_6]$ -DMSO, rt)

**General procedure for the photocatalytic C–H trifluoromethylation of alkenes (Table 2, 3a–e, g–m)**

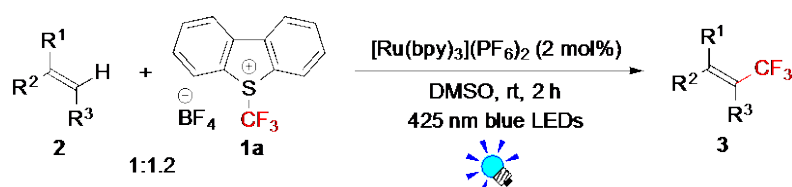

A 20 mL-Schlenk tube was charged with Umemoto's reagent (**1a**, 102 mg, 0.3 mmol, 1.2 equiv.),  $[\text{Ru}(\text{bpy})_3](\text{PF}_6)_2$  (4.3 mg, 2 mol %), alkene **2** (0.25 mmol), and DMSO (2.5 mL) under  $\text{N}_2$ . The tube was irradiated for 2 h at room temperature (water bath) with stirring by 3 W blue LED lamps ( $h\nu = 425 \text{ nm} \pm 15 \text{ nm}$ ) placed at a distance of 2–3 cm. After the reaction,  $\text{H}_2\text{O}$  was added. The resulting mixture was extracted with  $\text{Et}_2\text{O}$ , washed with  $\text{H}_2\text{O}$ , dried ( $\text{Na}_2\text{SO}_4$ ), and filtered. The filtrate was concentrated in vacuo. The product was purified in two ways as described below.

For products **3b**, **3e**, **3g**, **3h**, **3k** and **3m**, the residue was purified by flash column chromatography on silica gel (eluent: hexane and  $\text{Et}_2\text{O}$ ) to afford the corresponding product **3**.

For products **3a**, **3c**, **3d**, **3i**, **3j** and **3l**, the residue was treated by mCPBA (74 mg, ca. 0.3 mmol)

in CH<sub>2</sub>Cl<sub>2</sub> to convert the dibenzothiophene to sulfoxide, which was more easily separated from the products. After the solution was stirred at room temperature for 2 h, an aqueous solution of Na<sub>2</sub>S<sub>2</sub>O<sub>3</sub>·5H<sub>2</sub>O was added to the solution, which was extracted with CH<sub>2</sub>Cl<sub>2</sub>. The organic layer was washed with H<sub>2</sub>O, dried (Na<sub>2</sub>SO<sub>4</sub>), and filtered. The filtrate was concentrated in vacuo and the residue was purified by flash column chromatography on silica gel (eluent: hexane) to afford the corresponding product **3**. Further purification of **3c** and **3d** by GPC provided pure **3c** and **3d**. **3a**[4], **3b**[5], **3e**[5], **3j**[6], **3l**[7] and **3m**[7] were confirmed by published data.

### 1,1-Bis(4-chlorophenyl)-3,3,3-trifluoropropene (**3c**)

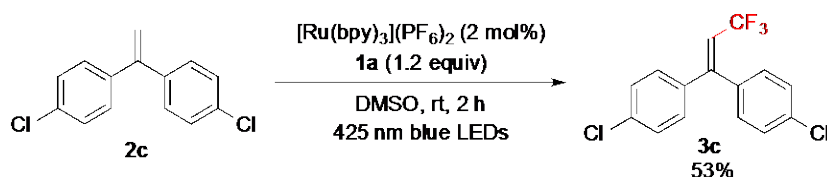

According to the general procedure, the title compound was synthesized from 1,1-bis(4-chlorophenyl)ethylene (**2c**, 62 mg, 0.25 mmol). The product was purified by silica gel flash column chromatography (hexane) to afford **3c** (82%) as a product mixture with bis(trifluoromethyl)alkene **4c** (8%). The yields were determined by <sup>19</sup>F NMR using α,α,α-trifluorotoluene as an internal standard. Further purification by GPC provided pure **3c** in 53% isolated yield.

<sup>1</sup>H NMR (400 MHz, CDCl<sub>3</sub>, rt): δ 7.38 (d, *J* = 8.8 Hz, 2 H, Ar), 7.32 (d, *J* = 8.8 Hz, 2 H, Ar), 7.16 (d, *J* = 8.4 Hz, 4 H, Ar), 6.12 (q, *J* = 8.1 Hz, 1 H, C=CHCF<sub>3</sub>). <sup>13</sup>C NMR (100 MHz, CDCl<sub>3</sub>, rt): δ 150.4 (q, *J* = 5.4 Hz), 138.3, 136.1, 135.3, 135.2, 130.6, 129.3, 129.0, 128.7, 122.9 (q, *J* = 269 Hz), 116.5 (q, *J* = 33.9 Hz). <sup>19</sup>F NMR (376.5 MHz, CDCl<sub>3</sub>, rt): δ -55.76 (d, *J* = 7.91 Hz, 3 F). HRMS (ESI-TOF): calculated for [C<sub>15</sub>H<sub>9</sub>Cl<sub>2</sub>F<sub>3</sub>+Na]<sup>+</sup> requires 338.9926, found 338.9967.

### 1,1-Bis(4-bromophenyl)-3,3,3-trifluoropropene (**3d**)

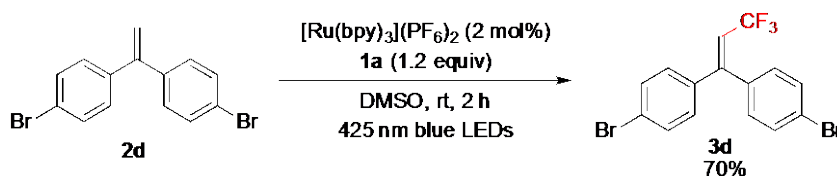

According to the general procedure, the title compound was synthesized from 1,1-bis(4-bromophenyl)ethylene (**2d**, 85 mg, 0.25 mmol). The product was purified by silica gel flash column chromatography (hexane) to afford **3d** (84%) as a product mixture with bis(trifluoromethyl)alkene **4d** (6%). The yields were determined by <sup>19</sup>F NMR using α,α,α-trifluorotoluene as an internal standard. Further purification by GPC provided pure **3d** in

70% isolated yield.

**<sup>1</sup>H NMR** (400 MHz, CDCl<sub>3</sub>, rt): δ 7.54 (d, *J* = 8.4 Hz, 2 H, Ar), 7.47 (d, *J* = 8.4 Hz, 2 H, Ar), 7.10 (d, *J* = 8.4 Hz, 4 H, Ar), 6.12 (q, *J* = 8.1 Hz, 1 H, C=CHCF<sub>3</sub>). **<sup>13</sup>C NMR** (100 MHz, CDCl<sub>3</sub>, rt): δ 150.4 (q, *J* = 5.4 Hz), 138.6, 135.7, 132.0, 131.7, 130.9, 129.6, 124.3, 123.4, 122.9 (q, *J* = 269 Hz), 116.5 (q, *J* = 34.0 Hz). **<sup>19</sup>F NMR** (376.5 MHz, CDCl<sub>3</sub>, rt): δ -55.72 (d, *J* = 7.91 Hz, 3 F). **HRMS** (ESI-TOF): calculated for [C<sub>15</sub>H<sub>9</sub>Br<sub>2</sub>F<sub>3</sub>+Na]<sup>+</sup> requires 426.8915, found 426.9055.

### *N*-(*tert*-Butoxycarbonyl)-4-(1-phenyl-3,3,3-trifluoropropenyl)aniline (**3f**)

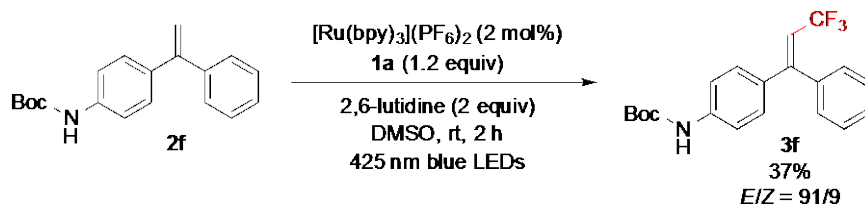

A 20 mL-Schlenk tube was charged with Umemoto's reagent (**1a**, 102 mg, 0.3 mmol, 1.2 equiv.), [Ru(bpy)<sub>3</sub>](PF<sub>6</sub>)<sub>2</sub> (4.3 mg, 2 mol %), *N*-(*tert*-butoxycarbonyl)-4-(1-phenylvinyl)aniline (**2f**, 74 mg, 0.25 mmol), 2,6-lutidine (58 μL, 0.5 mmol, 2 equiv) and DMSO (2.5 mL) under N<sub>2</sub>. The tube was irradiated for 2 h at room temperature (water bath) with stirring by 3 W blue LED lamps (*hν* = 425 nm ± 15 nm) placed at a distance of 2–3 cm. After the reaction, H<sub>2</sub>O was added. The resulting mixture was extracted with Et<sub>2</sub>O, washed with H<sub>2</sub>O, dried (Na<sub>2</sub>SO<sub>4</sub>), and filtered. The filtrate was concentrated in vacuo. The residue was purified by flash column chromatography on silica gel (hexane→hexane/EtOAc = 9:1) to afford **3f** (60 mg, 59% yield, *E/Z* = 91:9) as a product mixture with bis(trifluoromethyl)alkene **4f** (21%). The yields were determined by <sup>19</sup>F NMR using α,α,α-trifluorotoluene as an internal standard. Further purification by GPC provided pure **3f** in 37% isolated yield. The stereochemistry was confirmed by <sup>1</sup>H NOESY NMR.

**<sup>1</sup>H NMR** (400 MHz, CDCl<sub>3</sub>, rt): δ 7.38 (m, 3 H, Ar), 7.32 (d, *J* = 8.8 Hz, 2 H, Ar), 7.22 (m, 2H, Ar), 7.17 (d, *J* = 8.4 Hz, 2 H, Ar), 6.53 (brs, 1 H, NH), 6.08 (q, *J* = 8.4 Hz, 1 H, C=CHCF<sub>3</sub> in *E*-isomer), 6.06 (q, *J* = 8.0 Hz, 1 H, C=CHCF<sub>3</sub> in *Z*-isomer), 1.53 (s, 9 H, C(CH<sub>3</sub>)<sub>3</sub> in *Z*-isomer), 1.52 (s, 9 H, C(CH<sub>3</sub>)<sub>3</sub> in *E*-isomer). **<sup>13</sup>C NMR** (100 MHz, CDCl<sub>3</sub>, rt): δ 152.6, 152.0 (q, *J* = 5.3 Hz), 139.8, 137.5, 134.7, 129.3, 128.9, 128.6, 128.1, 123.4 (q, *J* = 269 Hz), 118.32, 114.2 (q, *J* = 33.6 Hz), 81.1, 28.4. **<sup>19</sup>F NMR** (376.5 MHz, CDCl<sub>3</sub>, rt): δ -55.32 (d, *J* = 8.28 Hz, 3 F, *E*-isomer), -55.56 (d, *J* = 9.04 Hz, 3 F, *Z*-isomer). **HRMS** (ESI-TOF): calculated for [C<sub>20</sub>H<sub>20</sub>F<sub>3</sub>NO<sub>2</sub>+Na]<sup>+</sup> requires 386.1338, found 386.1332.

### 3,3,3-Trifluoro-1-(4-nitrophenyl)-1-phenylpropene (3g)

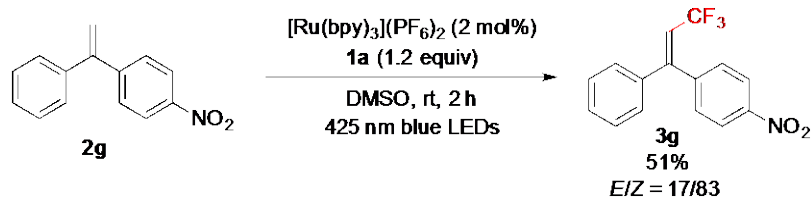

According to the general procedure, the title compound was synthesized from 1-(4-nitrophenyl)-1-phenylethylene (**2g**, 56 mg, 0.25 mmol). The product was purified by silica gel flash column chromatography (hexane→hexane/Et<sub>2</sub>O = 19:1) to afford **3g** (39 mg, 51% yield,  $E/Z = 17:83$ ). The stereochemistry was confirmed by <sup>1</sup>H NOESY NMR.

<sup>1</sup>H NMR (400 MHz, CDCl<sub>3</sub>, rt): δ 8.27 (d,  $J = 8.8$  Hz, 2 H, Ar in *Z*-isomer), 8.19 (d,  $J = 8.8$  Hz, 2 H, Ar in *E*-isomer), 7.45-7.35 (m, 5 H, Ar), 7.21 (d,  $J = 8.0$  Hz, 2 H, Ar), 6.25 (q,  $J = 8.1$  Hz, 1 H, C=CHCF<sub>3</sub> in *Z*-isomer), 6.22 (q,  $J = 8.0$  Hz, 1 H, C=CHCF<sub>3</sub> in *Z*-isomer). <sup>13</sup>C NMR (100 MHz, CDCl<sub>3</sub>, rt): δ 150.4 (q,  $J = 5.4$  Hz), 148.5, 148.2, 146.4, 144.1, 138.7, 136.1, 130.3, 130.2, 129.3, 129.1, 129.0, 128.6, 127.9, 123.9, 123.5, 122.8 (q,  $J = 269$  Hz), 118.6 (q,  $J = 33.8$  Hz, *E*-isomer), 117.1 (q,  $J = 34.0$  Hz, *Z*-isomer). <sup>19</sup>F NMR (376.5 MHz, CDCl<sub>3</sub>, rt): δ -55.72 (d,  $J = 8.28$  Hz, 3 F, *Z*-isomer), -56.23 (d,  $J = 8.00$  Hz, 3 F, *E*-isomer). HRMS (ESI-TOF): calculated for [C<sub>15</sub>H<sub>10</sub>F<sub>3</sub>NO<sub>2</sub>+Na]<sup>+</sup> requires 316.0556, found 316.0553.

### 3,3,3-Trifluoro-1-phenyl-1-(3-pyridyl)propene (3h)

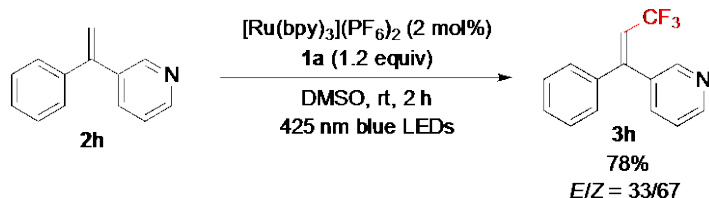

According to the general procedure, the title compound was synthesized from 1-phenyl-1-(3-pyridyl)ethylene (**2h**) (45 mg, 0.25 mmol). The product was purified by silica gel flash column chromatography (hexane→hexane/Et<sub>2</sub>O = 1:1) to afford **3h** (48 mg, 78% yield,  $E/Z = 33:67$ ). The stereochemistry was confirmed by <sup>1</sup>H NOESY NMR.

<sup>1</sup>H NMR (400 MHz, CDCl<sub>3</sub>, rt): δ 8.66 (dd,  $J = 4.8, 1.6$  Hz, 1H, Ar in *Z*-isomer), 8.60 (dd,  $J = 4.8, 1.2$  Hz, 1H, Ar in *E*-isomer), 8.56 (d,  $J = 2.0$  Hz, 1 H, Ar in *E*-isomer), 8.52 (d,  $J = 1.6$  Hz, 1H, Ar in *Z*-isomer), 7.57 (d,  $J = 7.8$  Hz, 1 H, Ar in *Z*-isomer), 7.51 (d,  $J = 8.1$  Hz, 1 H, Ar in *E*-isomer), 7.42-7.33 (m, 3 H, Ar), 7.28-7.22(m, 2 H, Ar), 6.23 (q,  $J = 8.1$  Hz, 1 H, C=CHCF<sub>3</sub> in *Z*-isomer) 6.16 (q,  $J = 8.0$  Hz, 1 H, C=CHCF<sub>3</sub> in *E*-isomer). <sup>13</sup>C NMR (100 MHz, CDCl<sub>3</sub>, rt): δ 150.5, 149.9, 149.6, 149.1 (q,  $J = 5.3$  Hz), 148.8, 139.3, 136.6, 136.3, 136.0, 135.4, 133.3, 130.0, 129.1, 128.9, 128.5, 128.0, 123.4, 123.1, 122.9 (q,  $J = 269$  Hz, *Z*-isomer), 122.8 (q,  $J = 270$  Hz, *E*-isomer), 117.3 (q,  $J = 33.4$  Hz, *Z*-isomer), 116.9 (q,  $J = 33.3$  Hz, *E*-isomer). <sup>19</sup>F NMR



(376.5 MHz, CDCl<sub>3</sub>, rt):  $\delta$  -55.58 (d,  $J$  = 8.28 Hz, 3 F, *Z*-isomer), -55.99 (d,  $J$  = 8.28 Hz, 3 F, *E*-isomer). **HRMS** (ESI-TOF): calculated for [C<sub>14</sub>H<sub>10</sub>F<sub>3</sub>N+Na]<sup>+</sup> requires 272.0658, found 272.0657.

### 1,1,1-Trifluoro-3,5-diphenyl-5-methyl-2-hexene (3i)

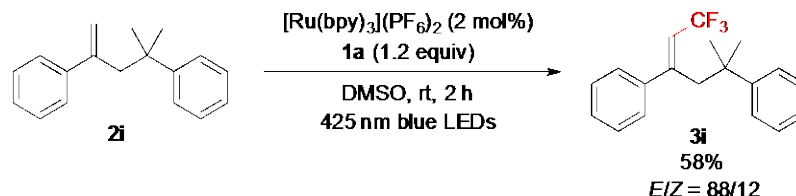

According to the general procedure, the title compound was synthesized from 2,4-diphenyl-4-methyl-1-pentene (**2i**, 59 mg, 0.25 mmol). The product was purified by silica gel flash column chromatography (hexane) to afford **3i** (45 mg, 58% yield, *E/Z* = 88:12). The stereochemistry was confirmed by <sup>1</sup>H NOESY NMR.

**<sup>1</sup>H NMR** (400 MHz, CDCl<sub>3</sub>, rt):  $\delta$  7.21-7.10 (m, 9 H, Ar), 7.06 (t,  $J$  = 7.0 Hz, Ar), 5.66 (q,  $J$  = 8.8 Hz, 1 H, C=CHCF<sub>3</sub> in *E*-isomer), 5.37 (q,  $J$  = 8.4 Hz, 1 H, C=CHCF<sub>3</sub> in *Z*-isomer), 3.09 (d,  $J$  = 1.2 Hz, 2 H, CCH<sub>2</sub>C in *E*-isomer), 2.80 (d,  $J$  = 1.2 Hz, 2 H, CCH<sub>2</sub>C in *Z*-isomer), 1.24 (s, 6 H, CH<sub>3</sub> in *Z*-isomer), 1.21 (s, 6 H, CH<sub>3</sub> in *E*-isomer). **<sup>13</sup>C NMR** (100 MHz, CDCl<sub>3</sub>, rt):  $\delta$  152.7 (q,  $J$  = 5.4 Hz), 149.3, 141.8, 128.3, 128.0, 127.0, 125.8, 125.7, 123.4 (q,  $J$  = 269 Hz), 119.6 (q,  $J$  = 33.1 Hz), 44.5, 38.4, 28.8. **<sup>19</sup>F NMR** (376.5 MHz, CDCl<sub>3</sub>, rt):  $\delta$  -55.87 (d,  $J$  = 8.28 Hz, 3 F, *Z*-isomer), -55.96 (d,  $J$  = 9.41 Hz, 3 F, *E*-isomer). **HRMS** (ESI-TOF): calculated for [C<sub>19</sub>H<sub>19</sub>F<sub>3</sub>+Na]<sup>+</sup> requires 327.1331, found 327.1332.

### 3,3,3-Trifluoro-1-(4-methoxyphenyl)-2-methyl-1-phenylpropene (3k)

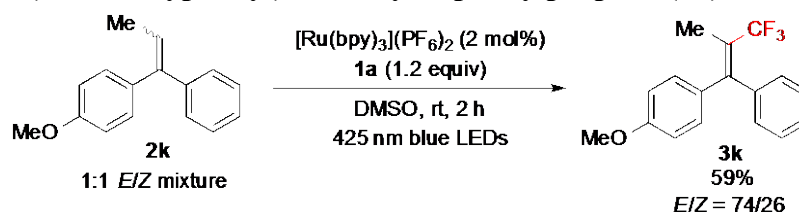

According to the general procedure, the title compound was synthesized from 1-methoxyphenyl-1-phenylpropene (**2k**). The product was purified by silica gel flash column chromatography (hexane→hexane/Et<sub>2</sub>O = 29:1) to afford **3k** (45 mg, 59% yield, *E/Z* = 74/26). The stereochemistry was confirmed by <sup>1</sup>H NOESY NMR.

**<sup>1</sup>H NMR** (400 MHz, CDCl<sub>3</sub>, rt):  $\delta$  7.34-7.27 (m, 3 H, Ar), 7.14 (d,  $J$  = 9.6 Hz, 2 H, Ar in *E*-isomer), 7.12 (d,  $J$  = 8.4 Hz, 2 H, Ar in *Z*-isomer), 7.08 (d,  $J$  = 8.8 Hz, 2 H, Ar in *Z*-isomer), 7.05 (d,  $J$  = 8.8 Hz, 2 H, Ar in *E*-isomer), 6.85 (d,  $J$  = 8.8 Hz, 2 H, Ar in *E*-isomer), 6.82 (d,  $J$  = 8.8 Hz, 2 H, Ar in *Z*-isomer), 3.80 (s, 3 H, CH<sub>3</sub>O in *E*-isomer), 3.79 (s, 3 H, CH<sub>3</sub>O in *Z*-isomer),

1.96 (s, 3 H,  $\text{CH}_3\text{CCF}_3$  in *E*-isomer), 1.90 (s, 3 H,  $\text{CH}_3\text{CCF}_3$  in *Z*-isomer).  $^{13}\text{C}$  NMR (100 MHz,  $\text{CDCl}_3$ , rt):  $\delta$  159.3, 159.3, 147.3, 147.3, 141.8, 141.4, 133.7, 133.4, 130.5, 130.0, 129.0, 128.7, 128.4, 128.0, 127.8, 127.6, 124.8 (q,  $J = 274$  Hz), 123.0 (q,  $J = 27.9$  Hz), 113.8, 113.5, 55.4, 55.3, 16.5.  $^{19}\text{F}$  NMR (376.5 MHz,  $\text{CDCl}_3$ , rt):  $\delta$  -59.23 (s, 3 F, *E*-isomer), -59.36 (s, 3 F, *Z*-isomer). HRMS (ESI-TOF): calculated for  $[\text{C}_{17}\text{H}_{15}\text{F}_3\text{O}+\text{Na}]^+$  requires 315.0967, found 315.0963.

## Procedures for the photocatalytic double C–H trifluoromethylation of alkenes

### 2-Trifluoromethyl-3,3,3-trifluoro-1-bis(4-methoxyphenyl)propene (**4b**)

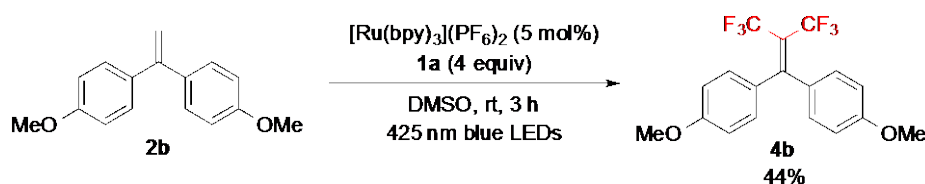

A 20 mL-Schlenk tube was charged with Umemoto's reagent (**1a**, 340 mg, 1.0 mmol, 4 equiv),  $[\text{Ru}(\text{bpy})_3](\text{PF}_6)_2$  (10.7 mg, 5 mol %), **2b** (60 mg, 0.25 mmol), and DMSO (5 mL) under  $\text{N}_2$ . The tube was irradiated for 3 h at room temperature (water bath) with stirring by 3 W blue LED lamps ( $h\nu = 425 \text{ nm} \pm 15 \text{ nm}$ ) placed at a distance of 2–3 cm. After the reaction,  $\text{H}_2\text{O}$  was added. The resulting mixture was extracted with  $\text{Et}_2\text{O}$ , washed with  $\text{H}_2\text{O}$ , dried ( $\text{Na}_2\text{SO}_4$ ), and filtered. The filtrate was concentrated in vacuo and the residue was purified by flash column chromatography on silica gel (hexane $\rightarrow$ hexane/ $\text{Et}_2\text{O} = 29:1$ ) to afford **4b** as a product mixture with **3b**. Further purification by GPC provided pure **4b** in 44% isolated yield.

$^1\text{H}$  NMR (400 MHz,  $\text{CDCl}_3$ , rt):  $\delta$  7.09 (d,  $J = 8.8$  Hz, 4 H, Ar), 6.87 (d,  $J = 8.8$  Hz, 4 H, Ar), 3.83 (s, 6 H,  $\text{CH}_3\text{O}$ ).  $^{13}\text{C}$  NMR (100 MHz,  $\text{CDCl}_3$ , rt):  $\delta$  161.3, 160.1, 132.3, 131.2, 122.3, (q,  $J = 273$  Hz), 115.7 (q,  $J = 30.1$  Hz), 113.7, 55.4.  $^{19}\text{F}$  NMR (376.5 MHz,  $\text{CDCl}_3$ , rt):  $\delta$  -54.80 (s, 6 F). HRMS (ESI-TOF): calculated for  $[\text{C}_{18}\text{H}_{14}\text{F}_6\text{O}_2+\text{Na}]^+$  requires 399.0790, found 399.0795.

### 1-Bis(4-bromophenyl)-2-trifluoromethyl-3,3,3-trifluoropropene (**4d**)

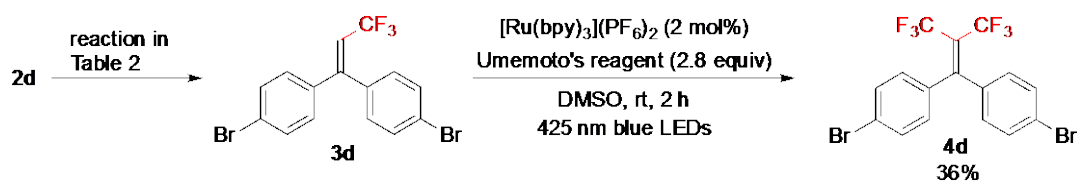

Two-step reactions were conducted. According to the procedure in Table 2, **2d** (85 mg, 0.25 mmol) was converted into the mixture of **3d** and a small amount of **4d** (90 mg). To the mixture, Umemoto's reagent (**1a**, 238 mg),  $[\text{Ru}(\text{bpy})_3](\text{PF}_6)_2$  (4.3 mg) and DMSO (5 mL) were added under  $\text{N}_2$ . The solution was placed at a distance of 2–3 cm from the 3 W blue LED lamp ( $h\nu =$

425 nm  $\pm$  15 nm) and stirred at room temperature (water bath) for 2 h. After the reaction, H<sub>2</sub>O was added. The resulting mixture was extracted with Et<sub>2</sub>O, washed with H<sub>2</sub>O, dried (Na<sub>2</sub>SO<sub>4</sub>), and filtered. The filtrate was concentrated in vacuo. The residue was treated by mCPBA (0.17 g, ca. 0.7 mmol) in CH<sub>2</sub>Cl<sub>2</sub> to convert the dibenzothiophene to sulfoxide, which was more easily separated from the products. After the solution was stirred at room temperature for 2 h, an aqueous solution of Na<sub>2</sub>S<sub>2</sub>O<sub>3</sub>·5H<sub>2</sub>O was added to the solution, which was extracted with CH<sub>2</sub>Cl<sub>2</sub>. The organic layer was washed with H<sub>2</sub>O, dried (Na<sub>2</sub>SO<sub>4</sub>), and filtered. The filtrate was concentrated in vacuo and the residue was purified by chromatography on silica gel (eluent: hexane) to afford **4d** as a product mixture with **3d**. Further purification by GPC provided pure **4d** in 36% isolated yield.

**<sup>1</sup>H NMR** (400 MHz, CDCl<sub>3</sub>, rt):  $\delta$  7.51 (d,  $J$  = 8.4 Hz, 4 H, Ar), 7.01 (d,  $J$  = 8.4 Hz, 4 H, Ar).

**<sup>13</sup>C NMR** (100 MHz, CDCl<sub>3</sub>, rt):  $\delta$  157.9, 137.7, 131.9, 130.3, 124.9, 121.5 (q,  $J$  = 276 Hz), 119.4 (q,  $J$  = 31.0 Hz), **<sup>19</sup>F NMR** (376.5 MHz, CDCl<sub>3</sub>, rt):  $\delta$  -55.31 (s, 6 F). **HRMS** (ESI-TOF): calculated for [C<sub>16</sub>H<sub>8</sub>Br<sub>2</sub>F<sub>6</sub>+Na]<sup>+</sup> requires 474.8950, found 474.8953.

### Time profile of the photocatalytic C–H trifluoromethylation of **2a**

The trifluoromethylation of **2a** was performed with/without visible light irradiation. The time profile is shown in Figure S3. As a result, continuous irradiation of visible light is essential for efficient reaction. Furthermore, the result of this experiment suggests that radical chain propagation is not the main component in this reaction.

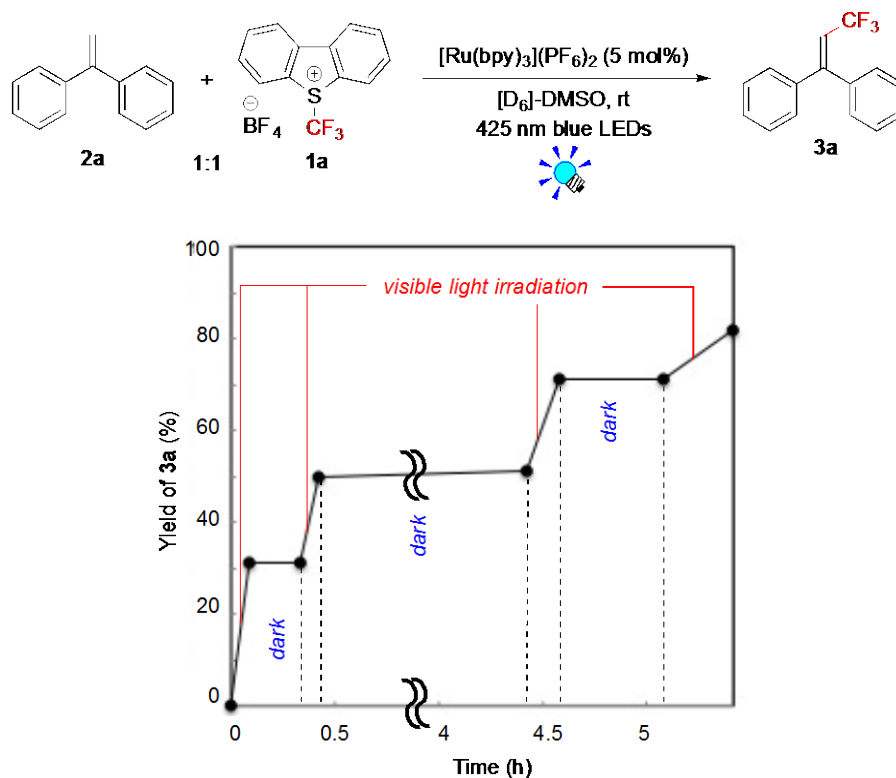

**Figure S3:** Time profile of the photocatalytic C–H trifluoromethylation of **2a**

# $^1\text{H}$ , $^{13}\text{C}$ NMR spectra

## Assignment of stereochemistry of product 3

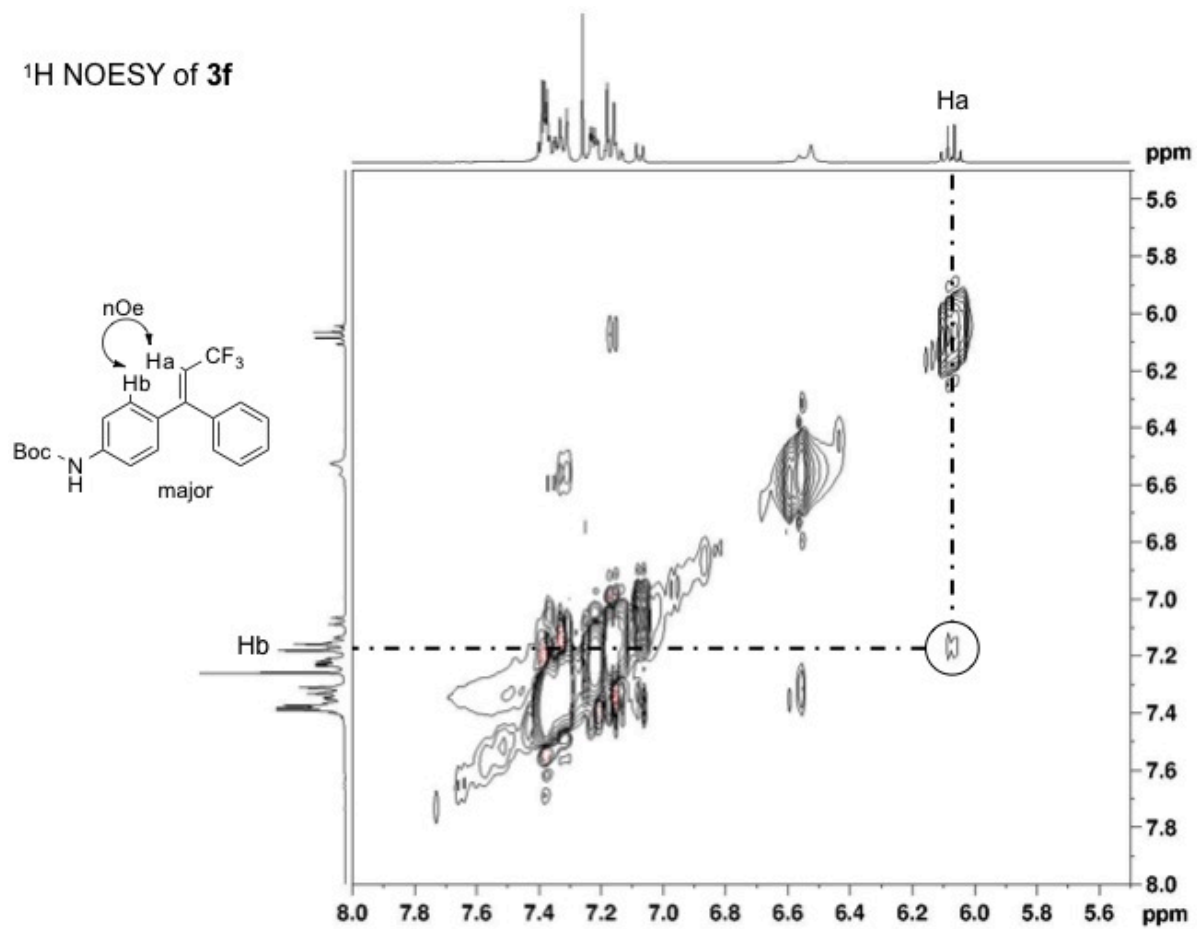

$^1\text{H}$  NOESY of **3g**

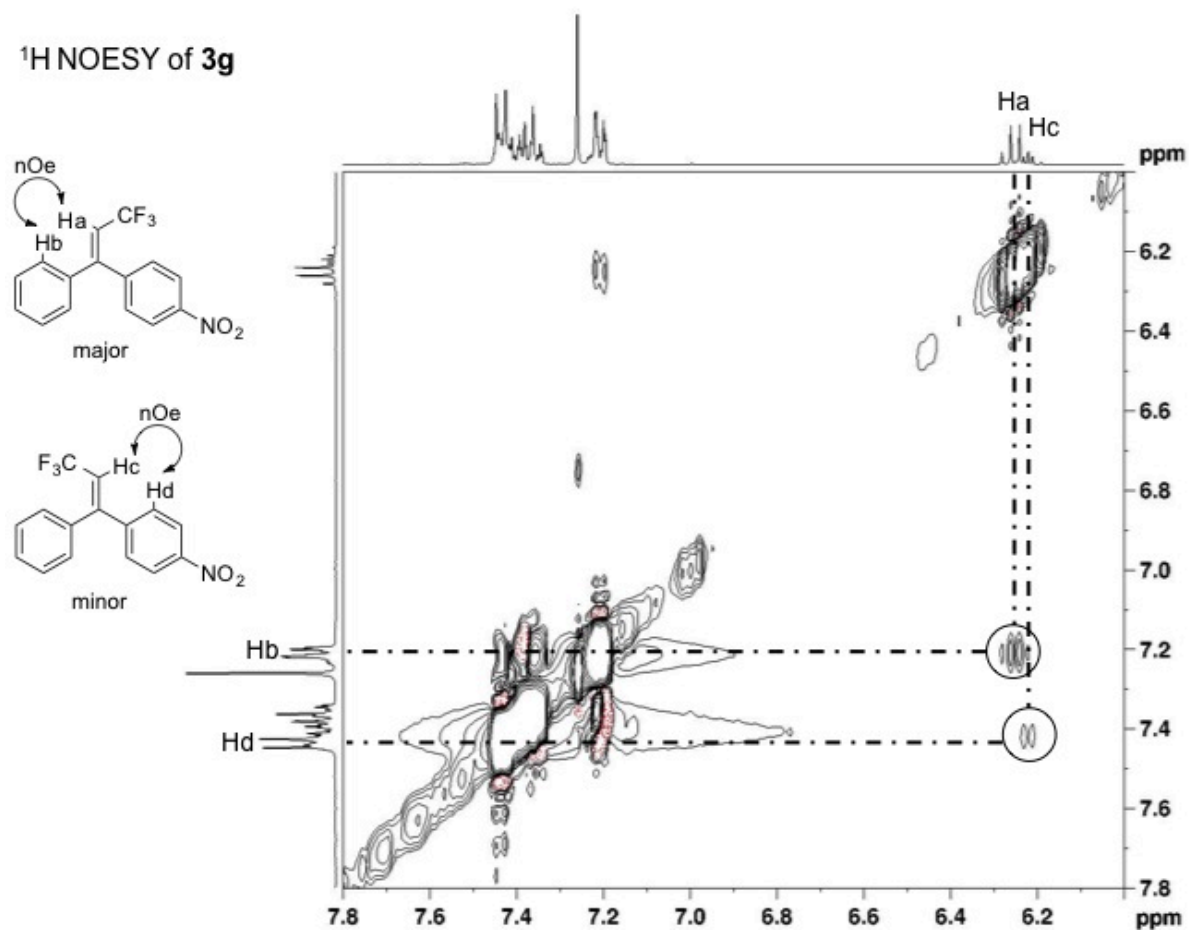

<sup>1</sup>H NOESY 3h

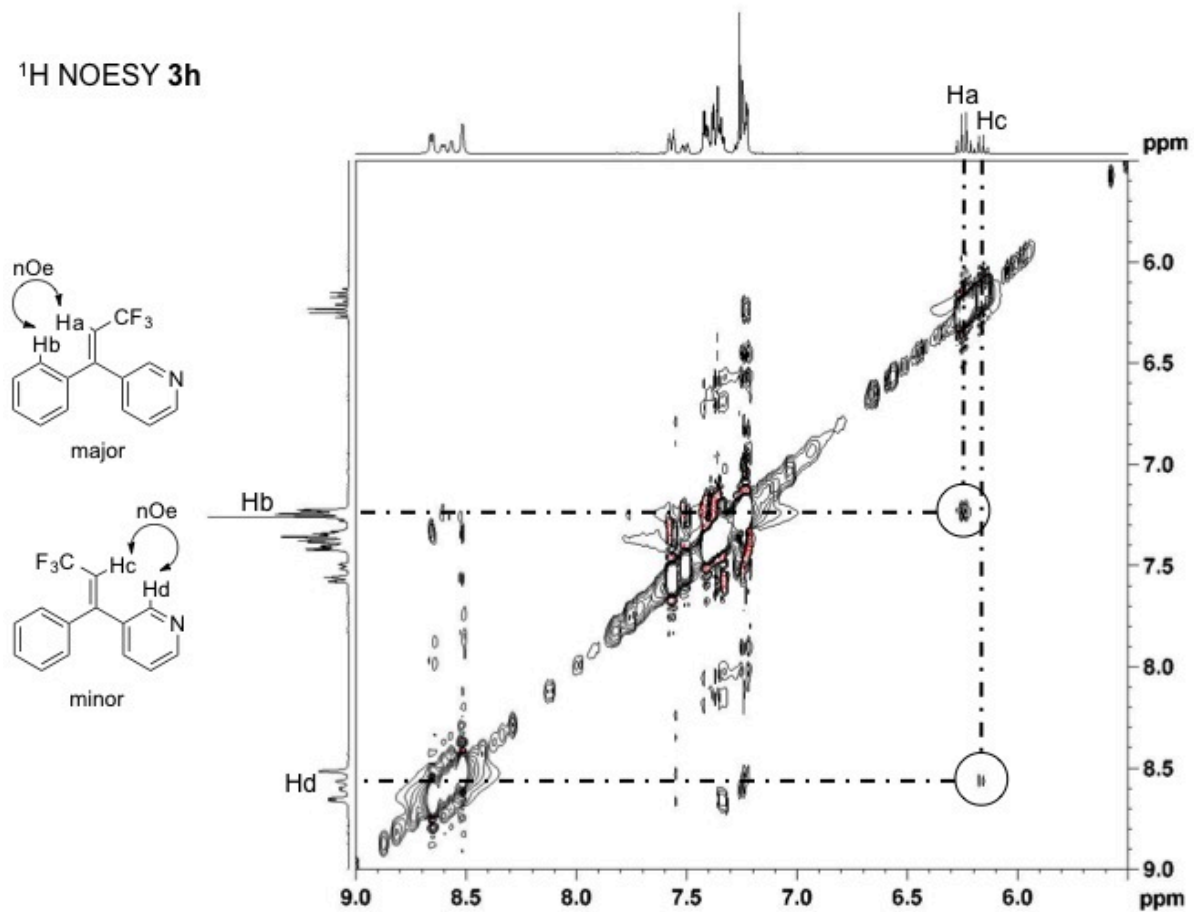

<sup>1</sup>H NOESY of **3i**

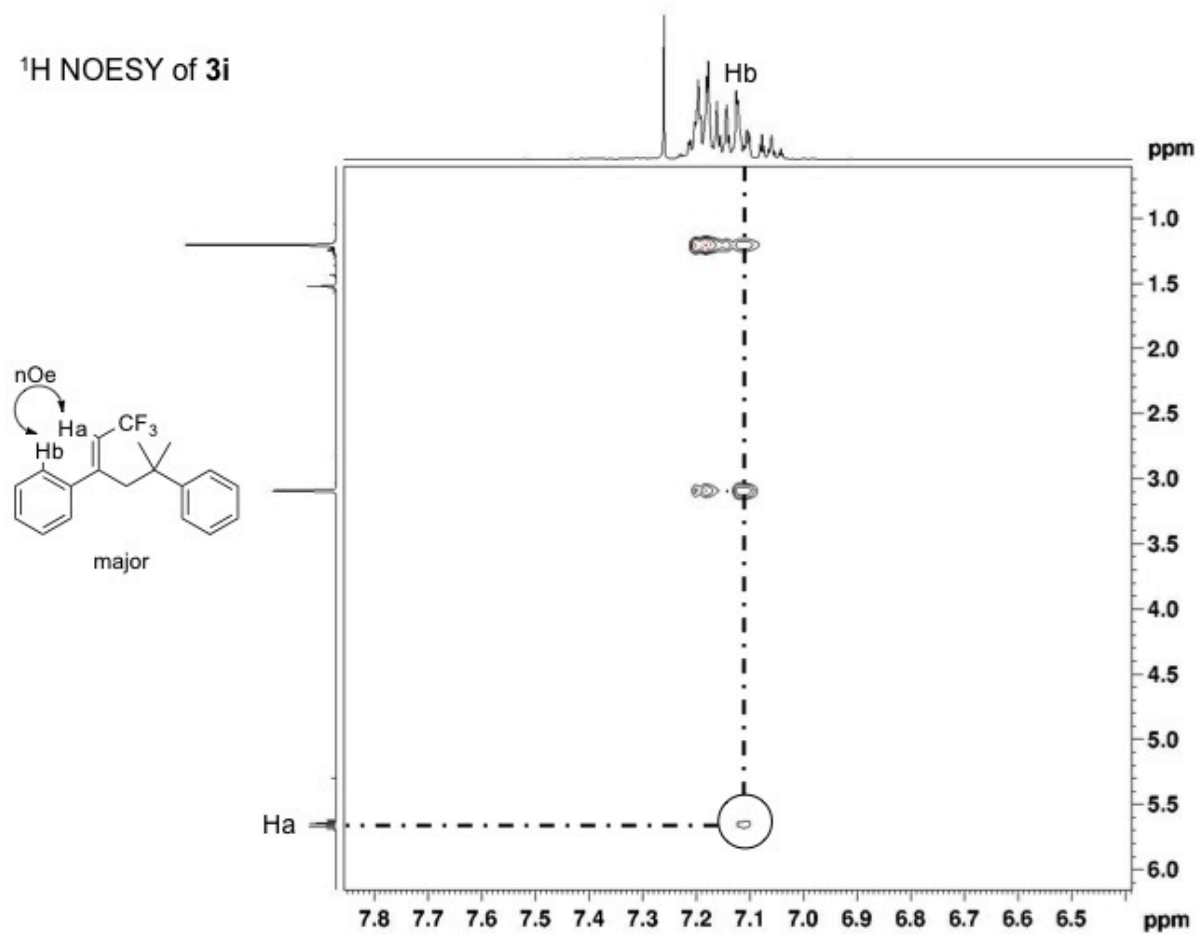



### <sup>1</sup>H NOESY of **3k**

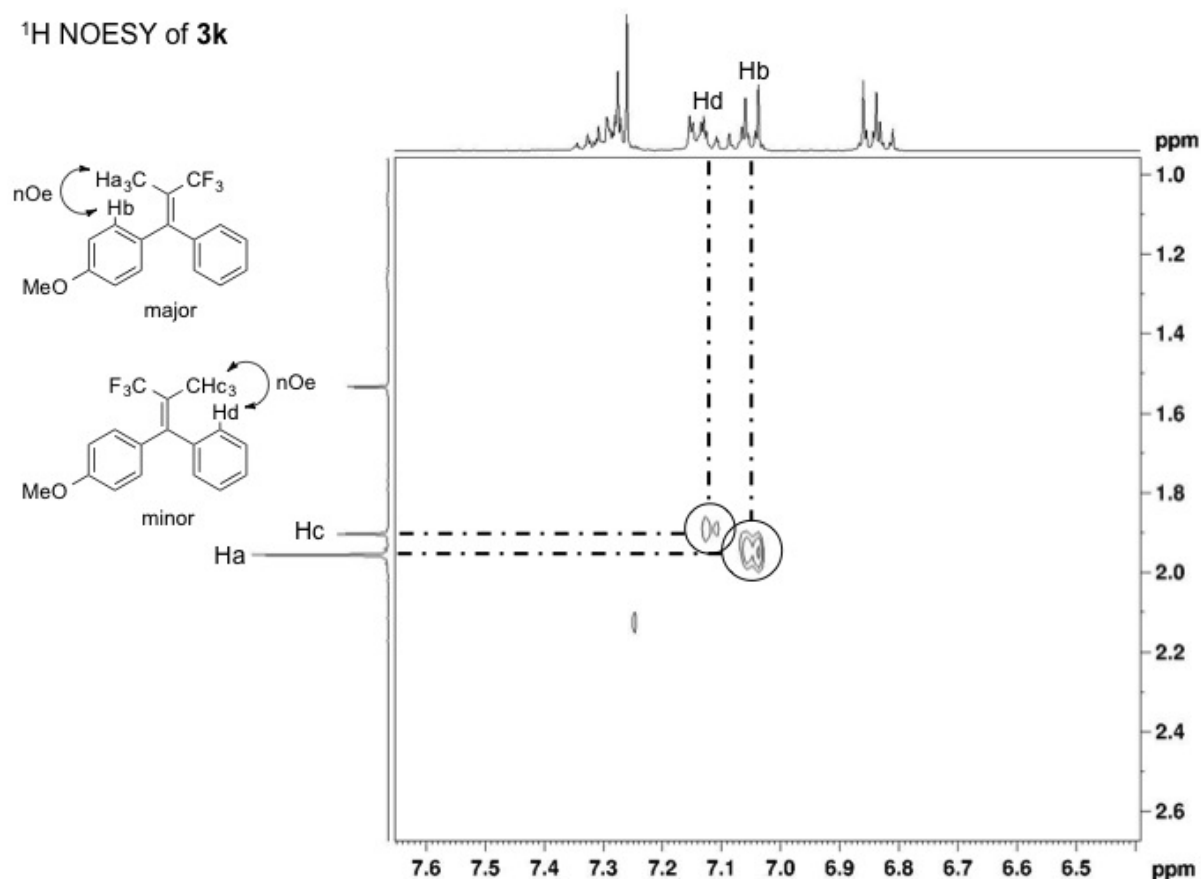

### References

- [1] Ross, H. B.; Boldaji, M.; Rillema, D. P.; Blanton, C. B.; White, R. P. *Inorg. Chem.* **1989**, *28*, 1013.
- [2] Tamayo, A. B.; Alleyne, B. D.; Djurovich, P. I.; Lamansky, S.; Tsyba, I.; Ho, N. N.; Bau, R.; Thompson, M. E. *J. Am. Chem. Soc.* **2003**, *125*, 7377.
- [3] Nunes, C. M.; Limberger, J.; Poersh, S.; Seferin, M.; Monteiro, A. L. *Synthesis* **2009**, *16*, 2761.
- [4] Cho, E. J.; Buchwald, S. L. *Org. Lett.* **2011**, *13*, 6552.
- [5] Alkhafaji, H. M. H.; Ryabukhin, D. S.; Muzalevskiy, V. M.; Vasilyev, A. V.; Fukin, G. K.; Shastin, A. V.; Nenajdenko, V. G. *Eur. J. Org. Chem.* **2013**, 1132.
- [6] Fuchibe, K.; Atobe, K.; Fujita, Y.; Mori, K.; Akiyama, T. *Chem. Lett.* **2010**, *39*, 867.
- [7] Liu, X.; Shimizu, M.; Hiyama, T. *Angew. Chem. Int. Ed.* **2004**, *43*, 879.

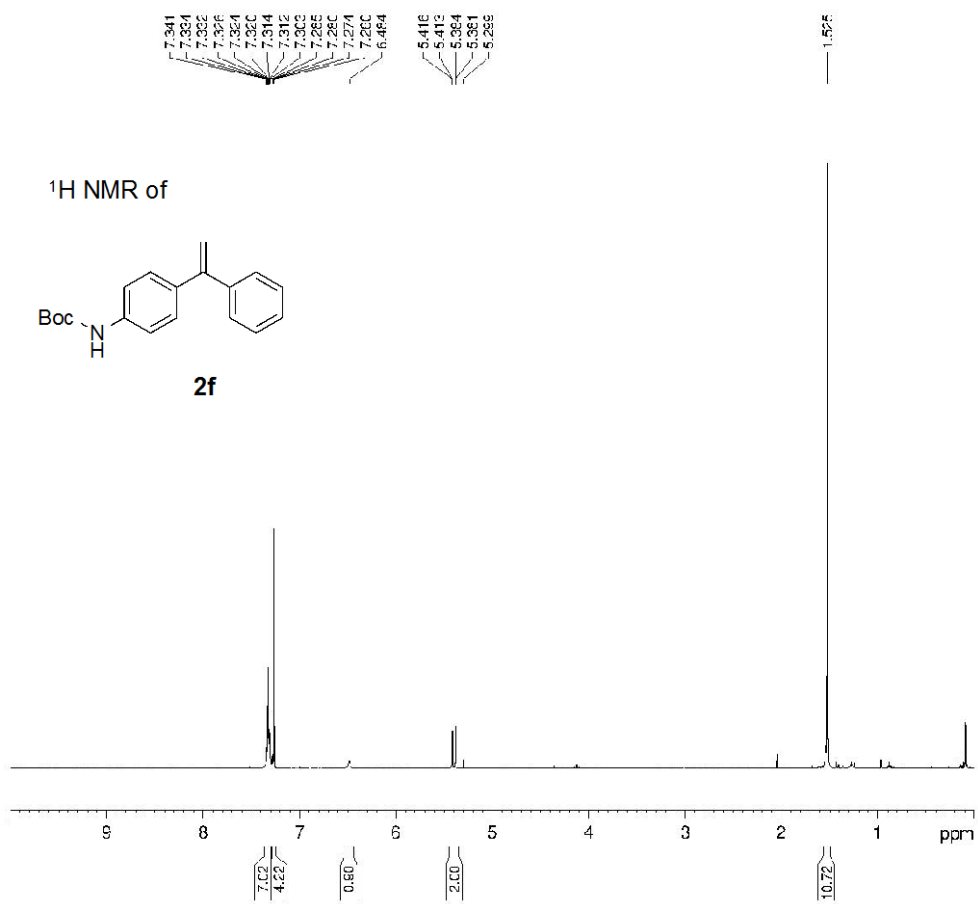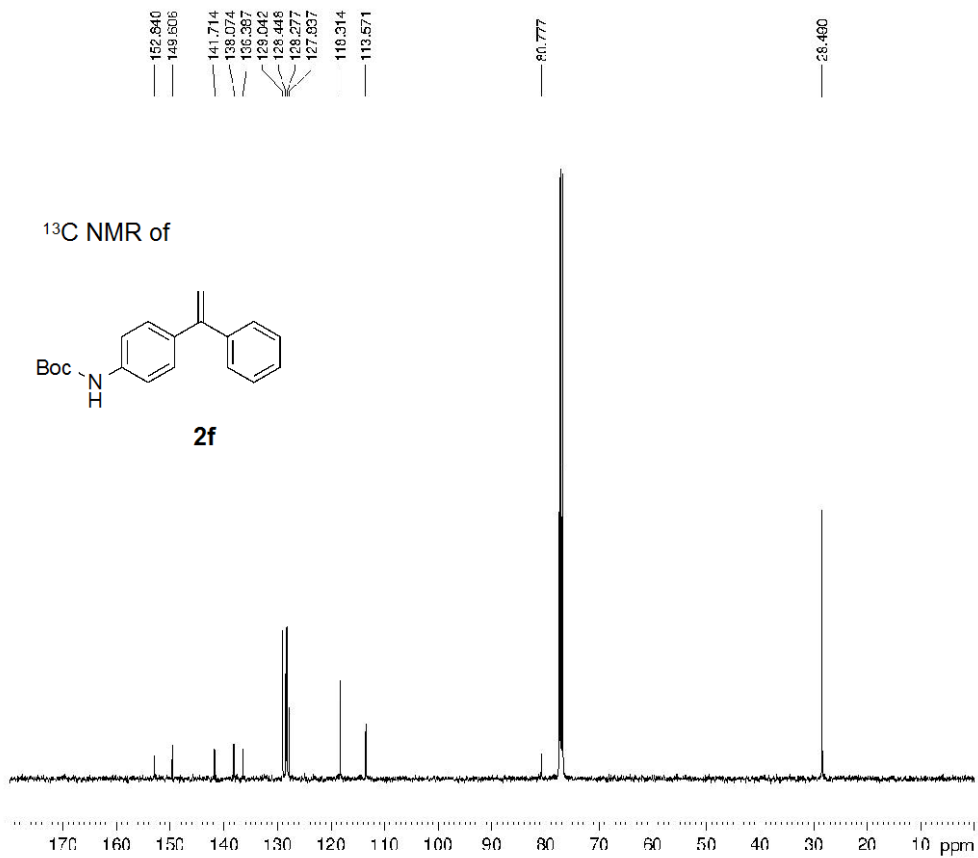

7.331  
7.370  
7.326  
7.305  
7.174  
7.152  
6.146  
6.126  
6.105  
6.085

<sup>1</sup>H NMR of

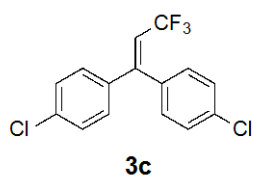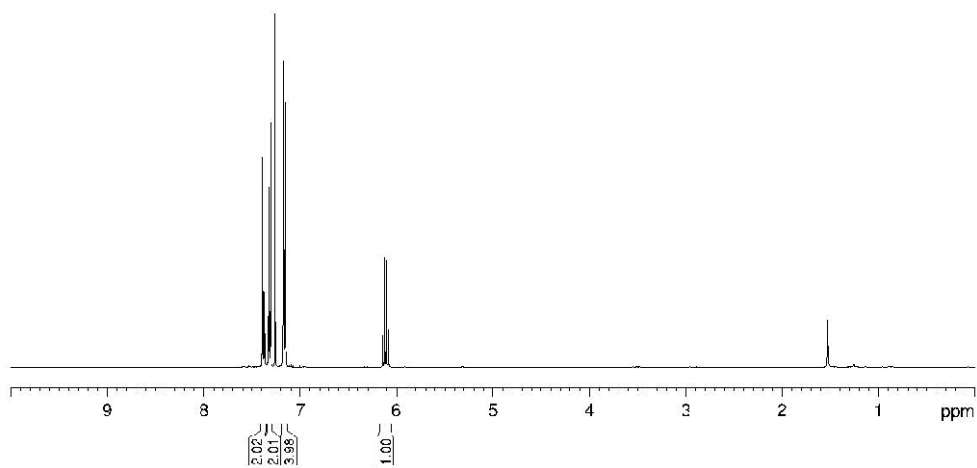

150.561  
150.526  
138.266  
136.064  
135.936  
135.152  
130.610  
129.548  
129.012  
128.701  
126.649  
124.257  
121.466  
118.873  
116.672  
116.632  
116.292  
115.952

<sup>13</sup>C NMR of

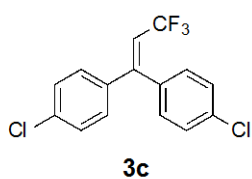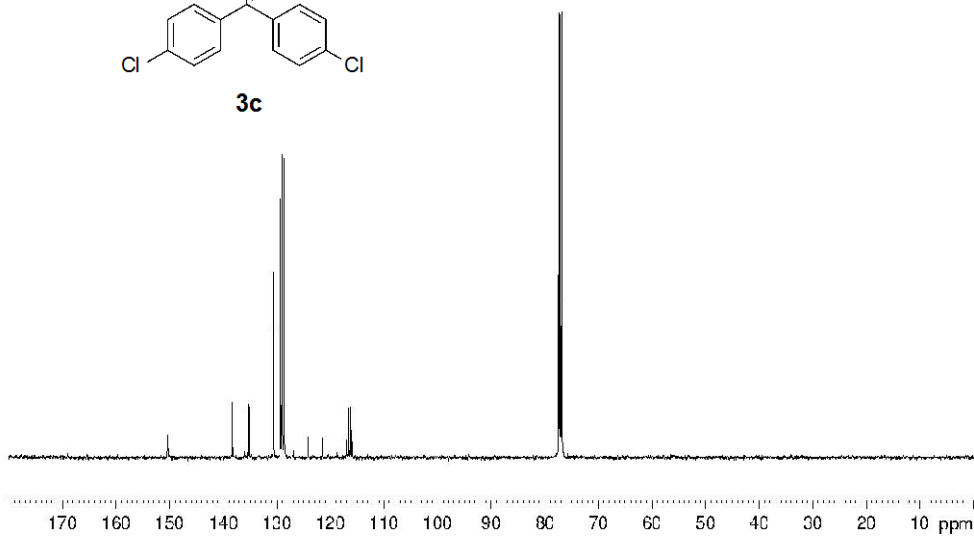

7.547  
7.525  
7.483  
7.431  
7.175  
7.055  
6.154  
6.134  
6.114  
6.093

<sup>1</sup>H NMR of

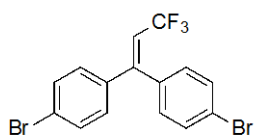

**3d**

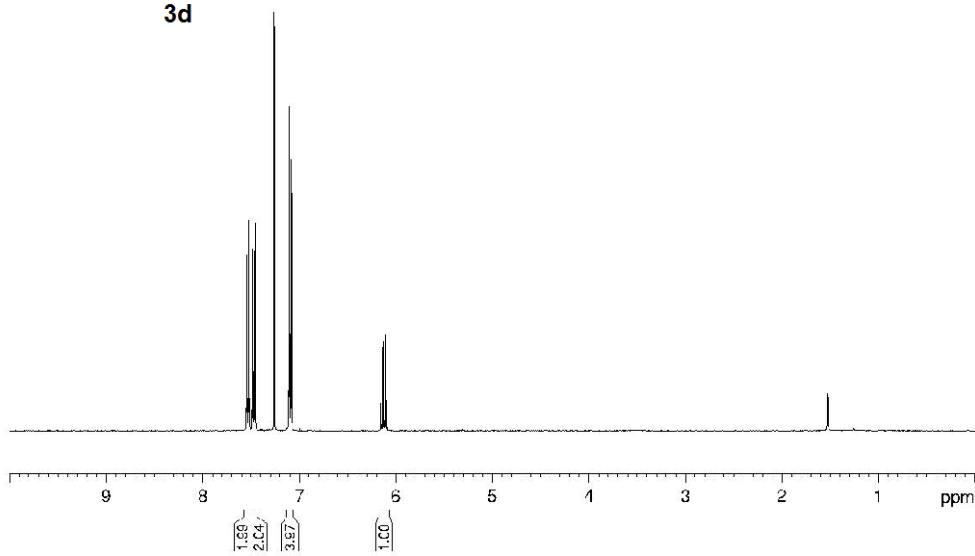

150.461  
150.406  
138.636  
135.733  
131.863  
131.865  
130.670  
128.585  
126.522  
124.337  
124.231  
123.368  
121.638  
116.848  
116.874  
116.834  
116.265  
115.854

<sup>13</sup>C NMR of

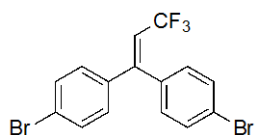

**3d**

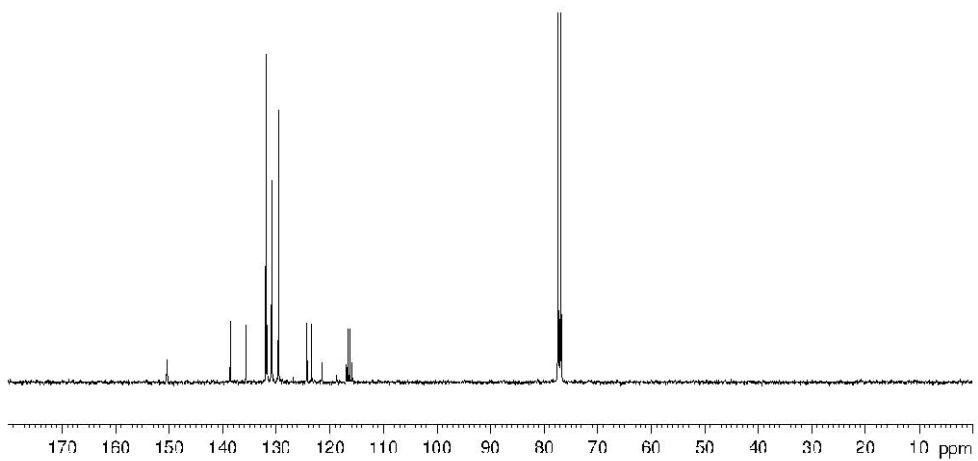

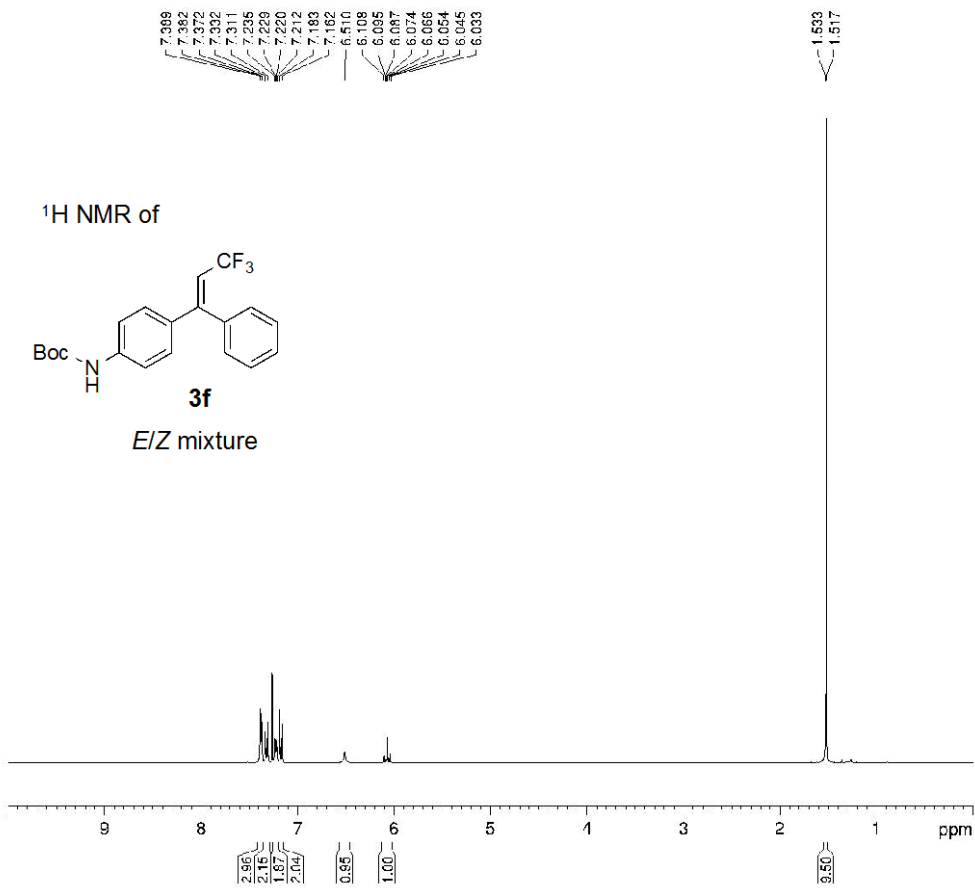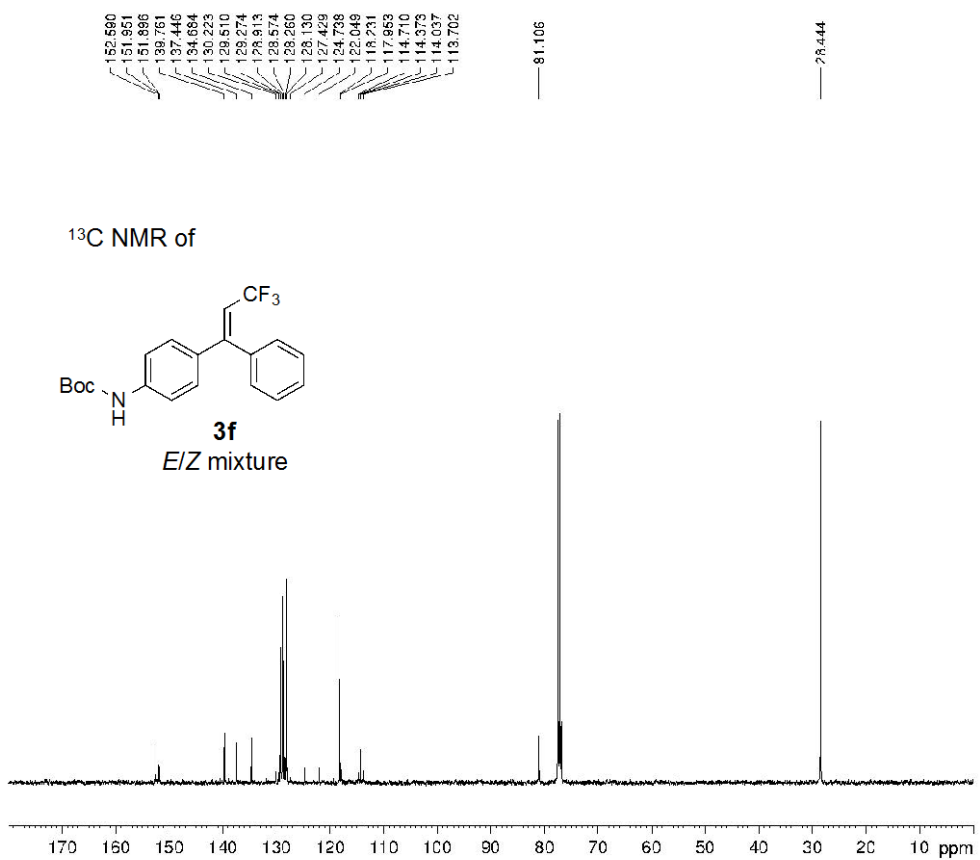

8.264  
6.263  
8.262  
8.263  
6.161  
7.447  
7.426  
7.363  
7.361  
7.362  
7.346  
7.219  
7.217  
7.199  
6.261  
6.240  
6.231  
6.220  
6.211

<sup>1</sup>H NMR of

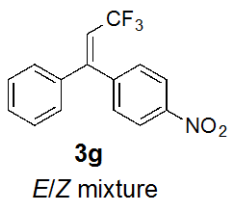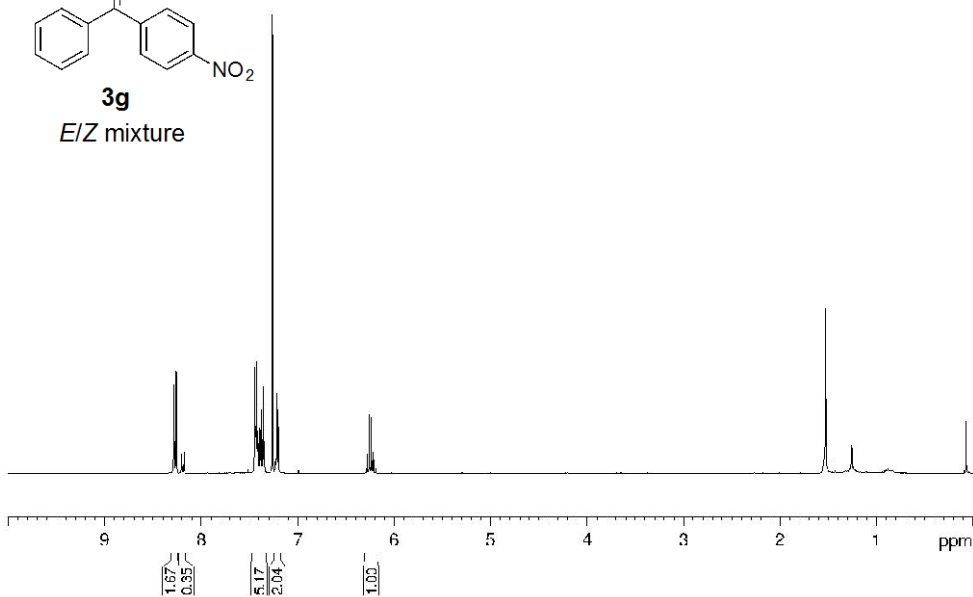

150.407  
150.353  
149.489  
149.173  
148.437  
144.064  
139.707  
135.141  
131.279  
130.189  
129.321  
129.101  
129.007  
127.861  
124.159  
123.972  
123.537  
121.466  
119.790  
115.452  
117.638  
117.289  
115.959  
115.618

<sup>13</sup>C NMR of

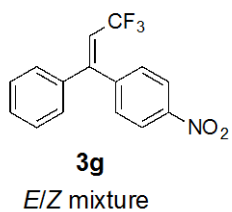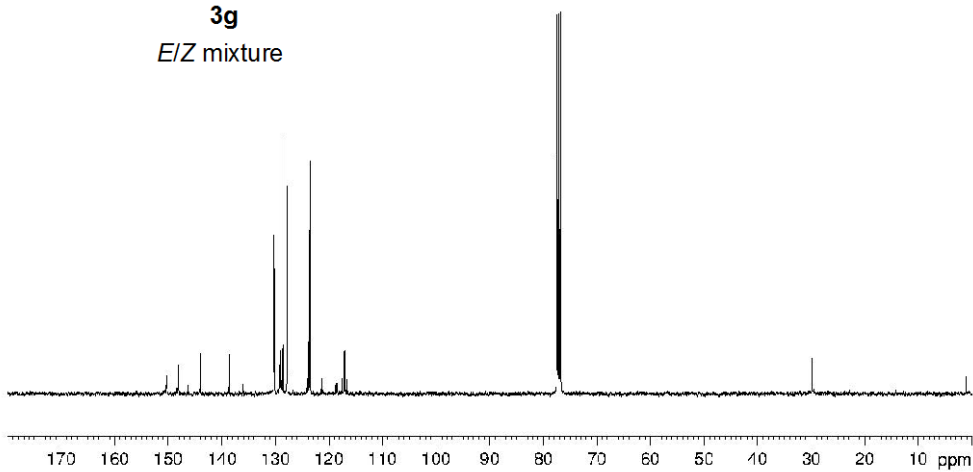

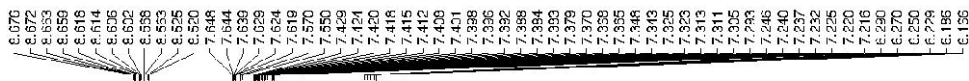

<sup>1</sup>H NMR of

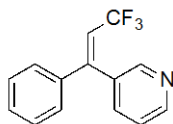

**3h**

*E/Z* mixture

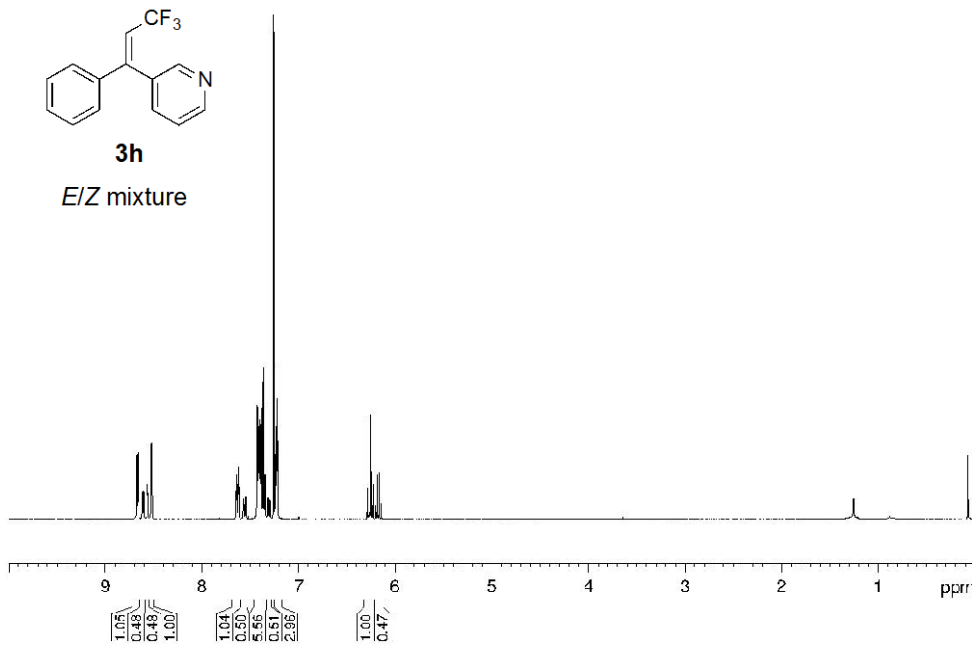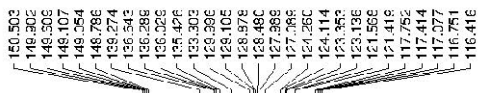

<sup>13</sup>C NMR of

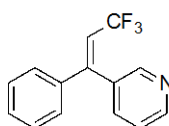

**3h**

*E/Z* mixture

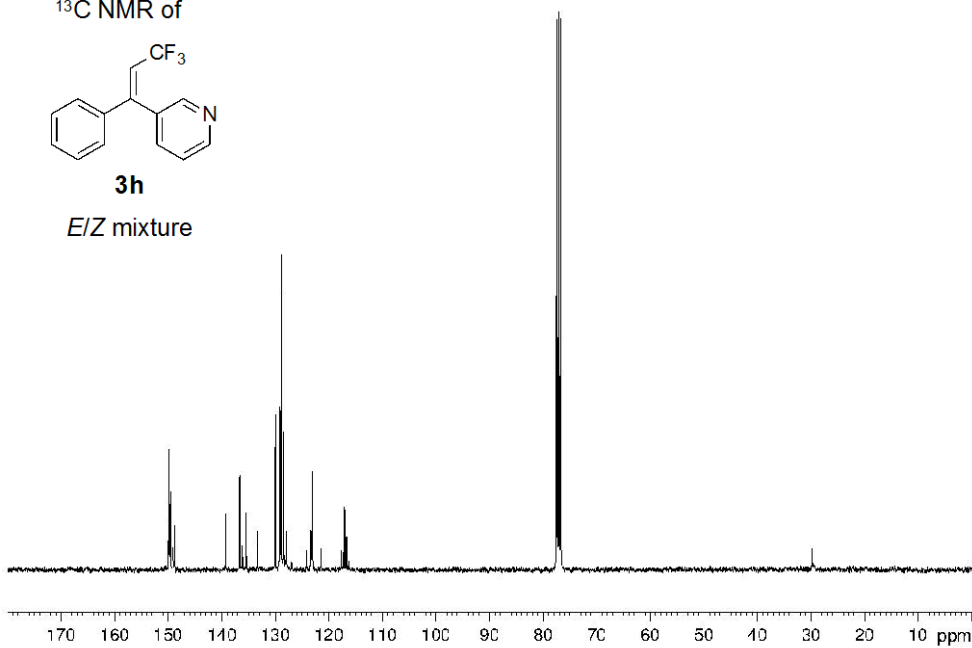

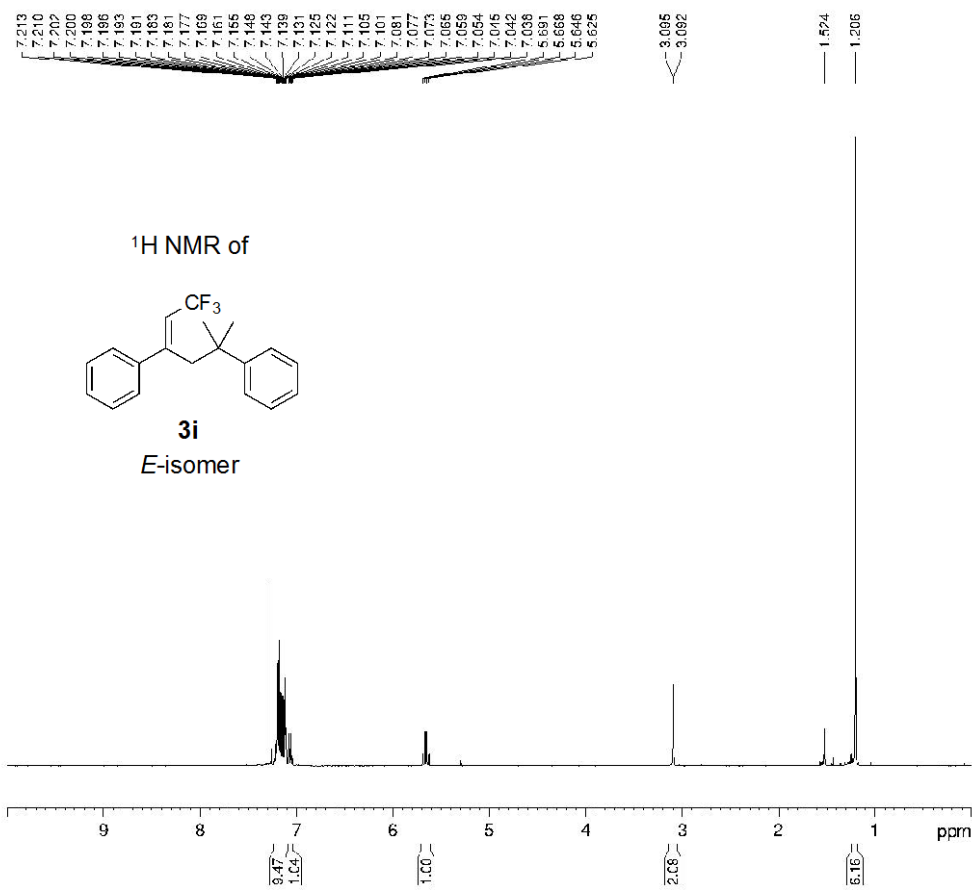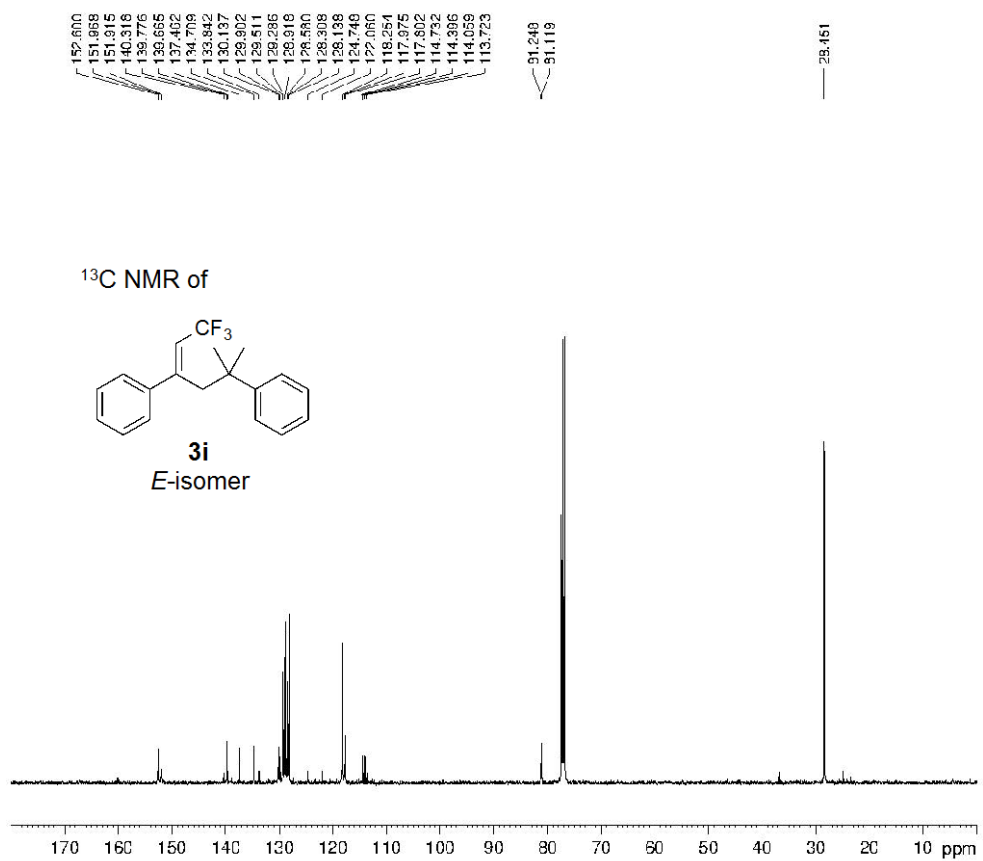



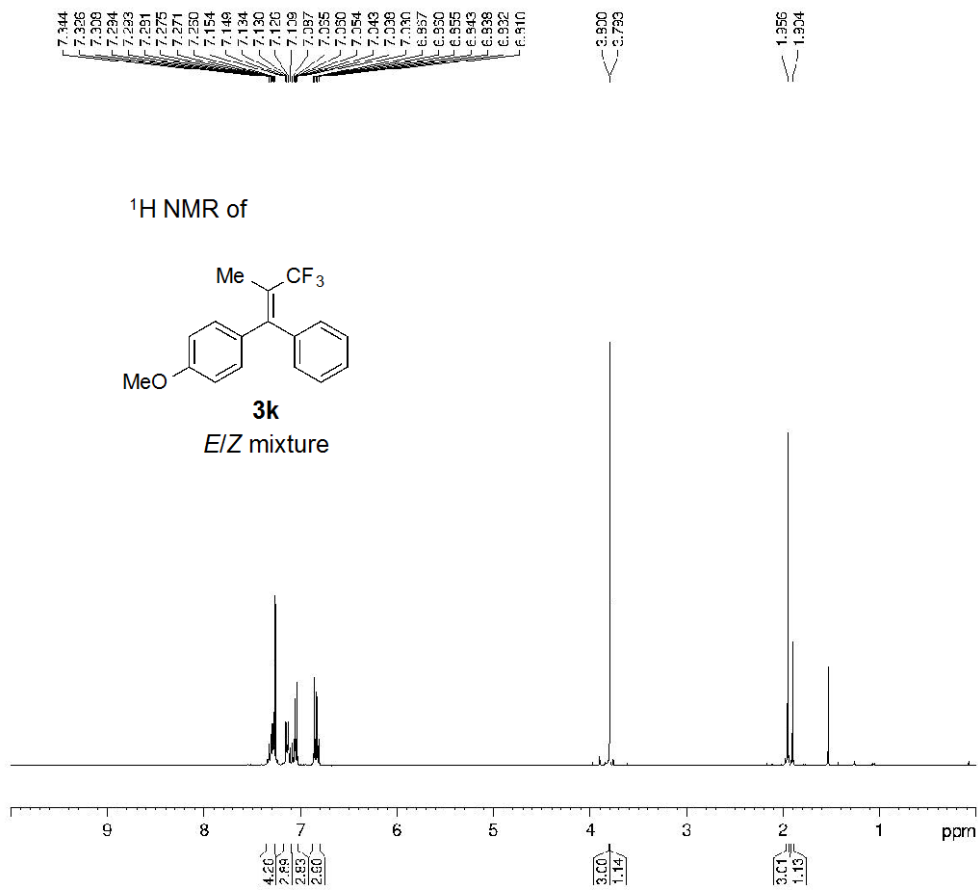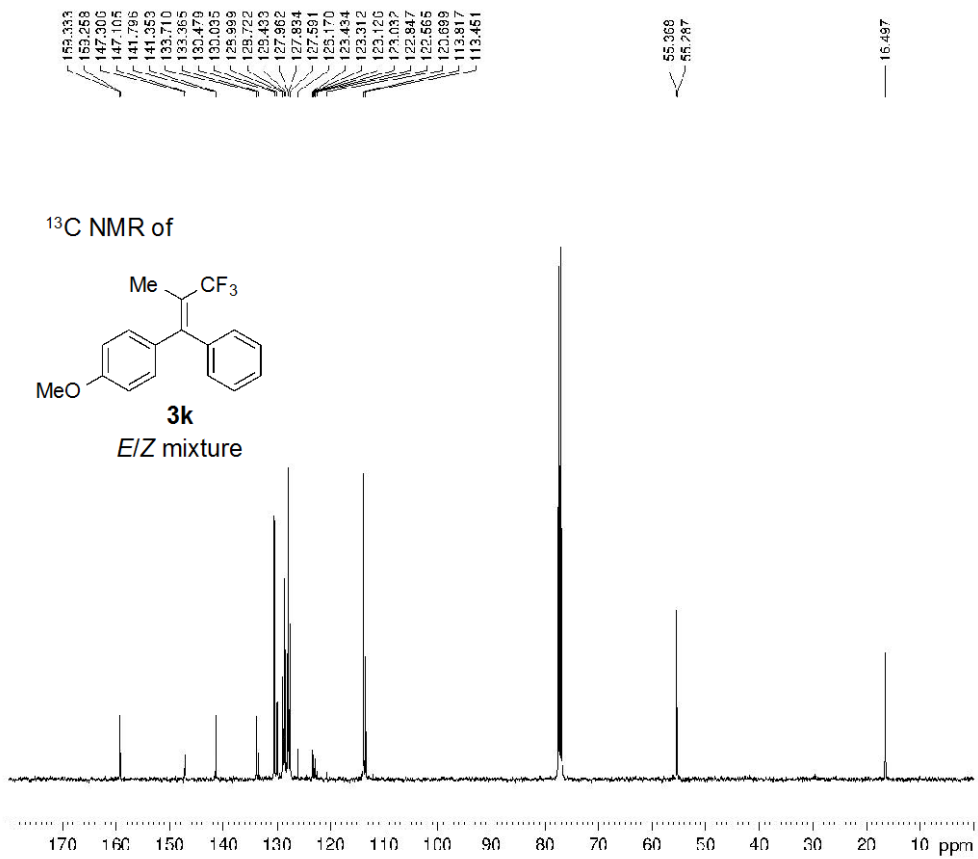

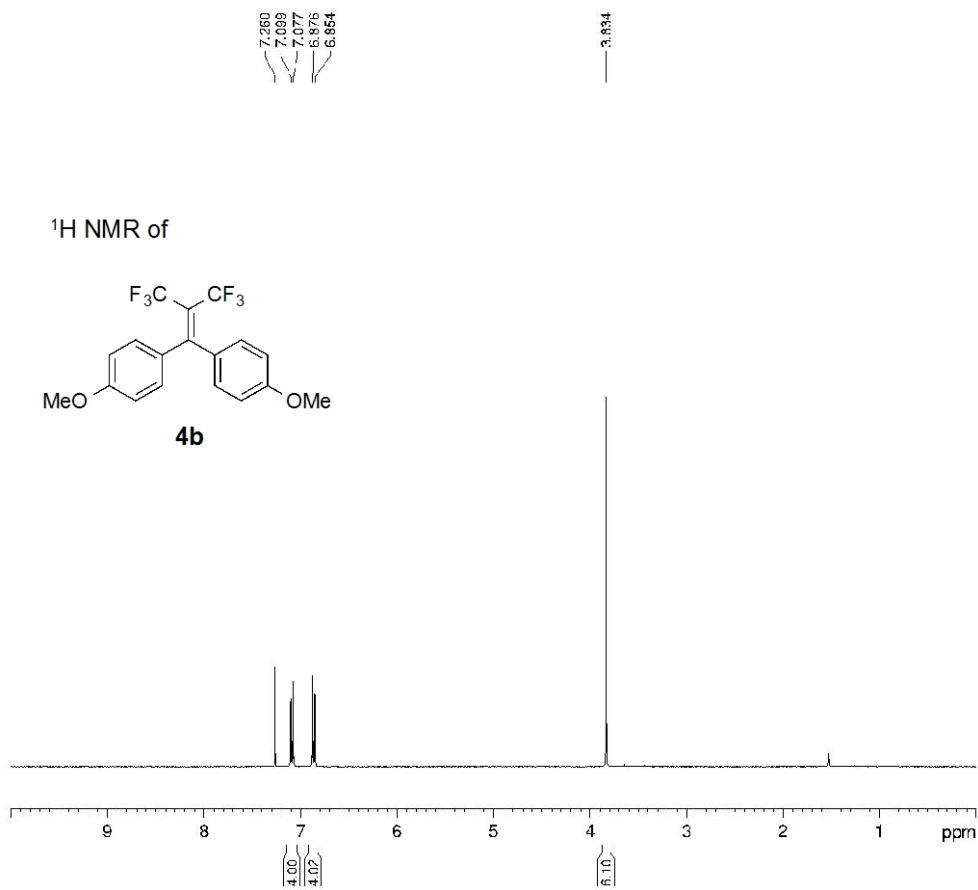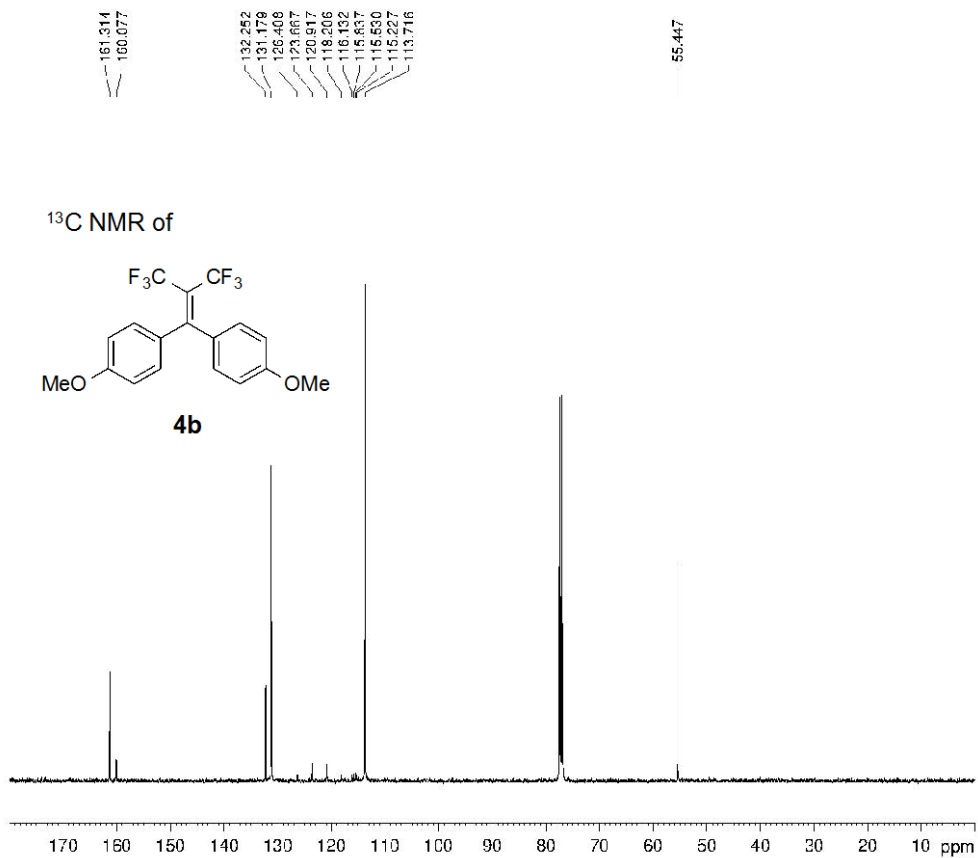

7.523  
7.402  
7.260  
7.024  
7.003

<sup>1</sup>H NMR of

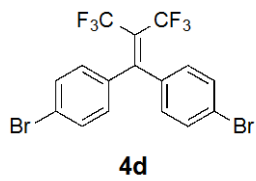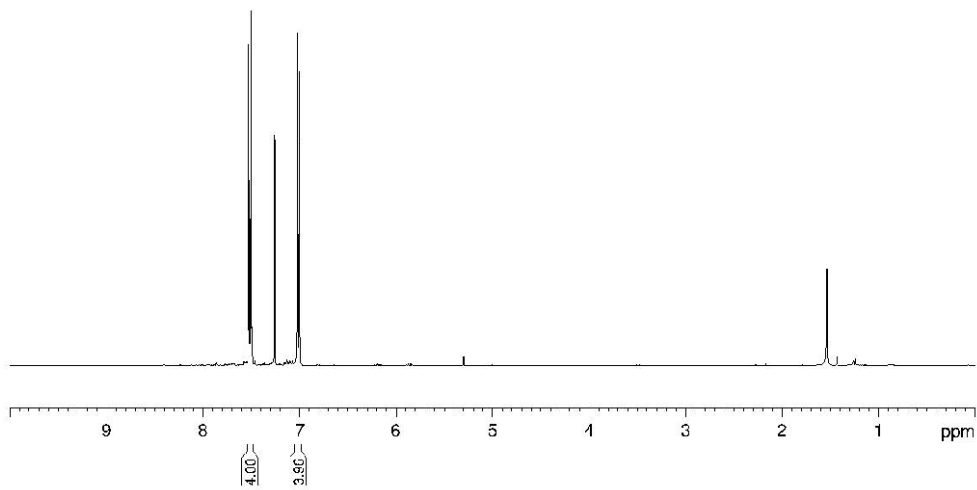

157.856  
137.710  
131.918  
130.258  
125.658  
124.894  
122.904  
120.145  
119.520  
118.210  
118.901  
117.396

<sup>13</sup>C NMR of

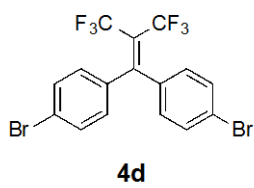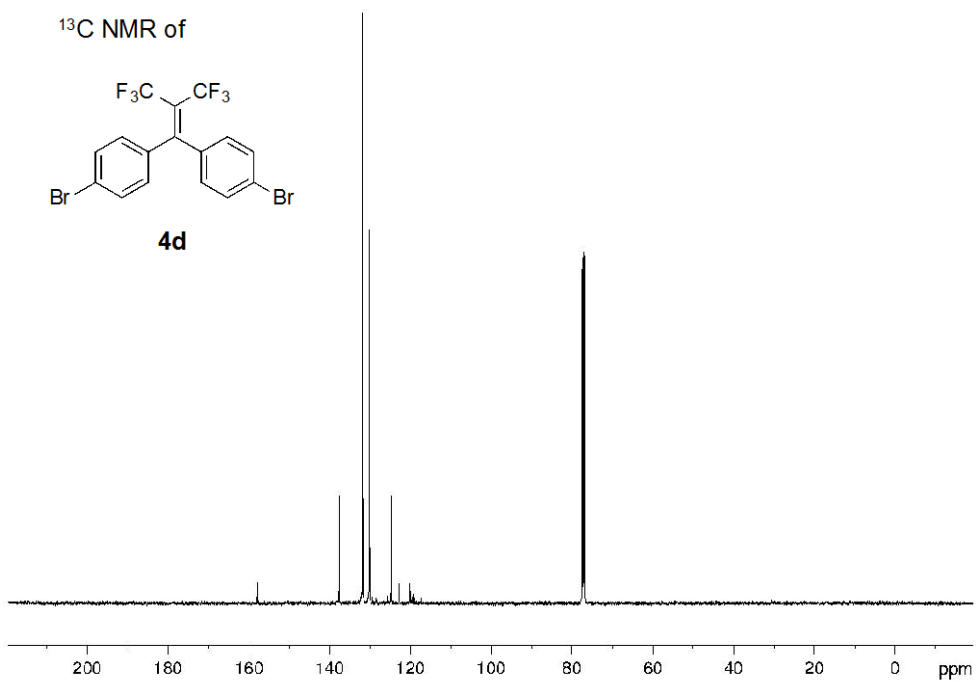

Supplement: Beilstein_J_Org_Chem-10-1099-s001.pdf [file Beilstein_J_Org_Chem-10-1099-s001.pdf]
